# Supplementary material
Source: HighWire-hosted journal article supplement (https://ard.bmj.com/content/annrheumdis-2017-211649)
Supplement: inline-supplementary-material-2 [file inline-supplementary-material-2.xls]

## Sheet: Supp Table 1_RAvsOA in BM
Affy ID	Gene Title	Gene Symbol	Mean EG	Median EG	Standard Deviation EG	Present Call EG	Mean BG	Median BG	Standard Deviation BG	Present Call BG	SLR Diff Regulated EG vs BG	FC Diff Regulated EG vs BG	Change Increased	Change Decreased	T-Test Signal	T-Test EG vs BG	T-Test EG vs EG	T-Test BG vs BG	No Change EG vs BG	No Change EG vs EG	No Change BG vs BG	Chromosomal Location	Gene Ontology Biological Process	Gene Ontology Cellular Component	Gene Ontology Molecular Function	Pathway
231513_at	---	---	106.05	93.85	65.3568	100	204.725	177.45	56.2689	100	-1.11563	-2.16689	3.125	75	0.00583822	1.09366e-12	1.17632e-07	1.88733e-13	21.875	32.1429	57.1429	---	---	---	---	---
237104_at	---	---	381.313	348.8	180.658	100	822.387	997.25	408.842	100	-0.792188	-1.7317	18.75	73.4375	0.113178	0.000249464	0.000234761	0.00633438	7.8125	35.7143	25	---	---	---	---	---
244592_at	---	---	110.462	122.2	52.9467	100	219.475	255.45	102.704	100	-0.84375	-1.79471	18.75	73.4375	0.123883	0.000513386	0.00170279	0.00543959	7.8125	32.1429	46.4286	---	---	---	---	---
242471_at	---	---	888.913	883.6	647.679	100	2132.24	2329.8	1394.93	100	-1.17344	-2.25548	20.3125	71.875	0.186321	0.00081202	0.00298312	0.00664308	7.8125	7.14286	10.7143	---	---	---	---	---
238142_at	---	---	84.4375	88.45	36.4864	87.5	139.688	158.8	68.1525	87.5	-0.667187	-1.58797	18.75	70.3125	0.277472	0.00143012	0.00294421	0.0117864	10.9375	53.5714	50	---	---	---	---	---
242695_at	---	---	340.688	387.45	206.522	100	702.962	806.35	405.978	100	-0.96875	-1.95714	18.75	70.3125	0.185928	0.00101343	0.00416871	0.0067431	10.9375	21.4286	14.2857	---	---	---	---	---
232396_at	---	---	219.225	225.6	139.487	100	485.325	545.55	270.741	100	-0.885937	-1.84797	17.1875	70.3125	0.163135	0.00241418	0.00493485	0.0169476	12.5	21.4286	28.5714	---	---	---	---	---
240094_at	---	---	999.675	893.25	534.288	100	1838.22	2146.8	946.316	100	-0.726562	-1.65469	20.3125	68.75	0.183114	0.00162438	0.00379461	0.0128524	10.9375	17.8571	21.4286	---	---	---	---	---
1557543_at	---	---	91.4375	79.35	61.4929	75	168.838	200.2	80.7948	75	-0.945313	-1.92561	15.625	68.75	0.132311	0.000330091	0.00121546	0.00367462	15.625	25	25	---	---	---	---	---
239946_at	---	---	111.638	98.1	68.74	100	246.438	288.55	135.941	100	-0.88125	-1.84197	15.625	68.75	0.221439	0.00619598	0.00839265	0.03762	15.625	17.8571	39.2857	---	---	---	---	---
243032_at	---	---	42.7	39.4	29.4555	62.5	101	114.9	48.7043	75	-1.2125	-2.31739	12.5	68.75	0.063577	1.51128e-05	0.000216565	0.000284581	18.75	35.7143	50	---	---	---	---	---
241891_at	---	---	375.975	390.25	251.185	100	690.325	839.3	375.241	100	-0.809375	-1.75245	21.875	67.1875	0.292112	0.0169875	0.0327457	0.0557378	10.9375	17.8571	32.1429	---	---	---	---	---
235190_at	---	---	421.613	436.75	147.066	100	702.775	779.65	292.173	100	-0.6	-1.51572	20.3125	67.1875	0.102203	0.000351018	0.000749802	0.00542917	12.5	25	25	---	---	---	---	---
1562289_at	---	---	272.688	273.65	121.163	100	455.488	534.95	205.558	100	-0.64375	-1.56238	15.625	67.1875	0.1882	0.00311673	0.00471268	0.0255381	17.1875	35.7143	39.2857	---	---	---	---	---
233690_at	---	---	238.013	297.1	149.407	87.5	410.9	499.4	219.919	100	-0.771875	-1.70749	15.625	67.1875	0.300309	0.0193248	0.0413801	0.0545654	17.1875	42.8571	35.7143	---	---	---	---	---
239516_at	---	---	125.887	135.35	70.2934	100	246.263	270.25	127.421	100	-0.796875	-1.73733	15.625	67.1875	0.140403	0.00139872	0.00222479	0.0150079	17.1875	28.5714	35.7143	---	---	---	---	---
1565597_at	---	---	69.2	71.2	48.2426	62.5	138.575	165.3	74.9464	75	-1.05313	-2.07502	14.0625	67.1875	0.247535	0.000488468	0.00200201	0.00470941	18.75	28.5714	50	---	---	---	---	---
239606_at	---	---	25.775	26.2	13.374	50	76.9625	84.85	44.5424	75	-1.19844	-2.29491	4.6875	67.1875	0.0461744	4.74476e-07	1.65261e-06	8.90509e-05	28.125	85.7143	35.7143	---	---	---	---	---
232615_at	---	---	309.363	308.25	194.436	100	513.663	628.6	270.909	100	-0.746875	-1.67815	20.3125	65.625	0.3851	0.0153171	0.0277646	0.0537943	14.0625	21.4286	42.8571	---	---	---	---	---
241929_at	---	---	522.087	502.3	317.835	100	886.25	959.2	448.451	100	-0.8	-1.7411	18.75	65.625	0.197603	0.00117834	0.00465012	0.00748149	15.625	10.7143	14.2857	---	---	---	---	---
242859_at	---	---	109.575	124.7	64.5132	75	172.7	204.65	90.1018	75	-0.626562	-1.54388	17.1875	65.625	0.499628	0.0664781	0.09285	0.14758	17.1875	21.4286	46.4286	---	---	---	---	---
243271_at	---	---	63.9	65.55	26.2246	100	118.413	133.85	59.7252	100	-0.86875	-1.82608	9.375	65.625	0.0972444	1.09856e-05	1.77986e-05	0.000774495	25	57.1429	35.7143	---	---	---	---	---
1563509_at	---	---	71.525	72	32.8267	62.5	156.575	185.05	91.4236	75	-0.721875	-1.64932	4.6875	65.625	0.279075	0.00371739	0.00334277	0.0330447	29.6875	67.8571	42.8571	---	---	---	---	---
235735_at	---	---	668	664.75	172.15	100	930.025	847.6	194.619	100	-0.523438	-1.43738	1.5625	65.625	0.0160726	3.20991e-11	1.59566e-07	7.19061e-10	32.8125	35.7143	50	---	---	---	---	---
1554948_at	---	---	357.962	383.75	270.635	87.5	770.612	811.4	515.695	87.5	-1.08437	-2.12046	20.3125	64.0625	0.262917	0.00605028	0.0150674	0.0257906	15.625	10.7143	17.8571	---	---	---	---	---
237383_at	---	---	119.725	141.35	70.2689	87.5	288.1	260.35	216.719	75	-1.0125	-2.0174	20.3125	64.0625	0.276515	0.00370379	0.00671839	0.0240024	15.625	21.4286	14.2857	---	---	---	---	---
242827_x_at	---	---	310.25	357.15	209.25	100	563.788	668.7	323.324	100	-0.696875	-1.62099	20.3125	64.0625	0.495819	0.0696223	0.104405	0.146367	15.625	17.8571	46.4286	---	---	---	---	---
1556352_at	---	---	336.4	371.85	241.24	100	695.475	833.4	448.4	100	-1.09375	-2.13428	18.75	64.0625	0.257833	0.00297577	0.00727746	0.0173649	17.1875	10.7143	17.8571	---	---	---	---	---
234148_at	---	---	53.3875	50.7	37.4988	62.5	125.588	148	72.7903	75	-0.748437	-1.67997	18.75	64.0625	0.330049	0.0500646	0.0606855	0.132984	17.1875	32.1429	32.1429	---	---	---	---	---
240154_at	---	---	95.9875	79.5	59.3958	25	173.2	197.7	95.0267	75	-0.715625	-1.64219	18.75	64.0625	0.291568	0.00355659	0.00515892	0.0270628	17.1875	32.1429	35.7143	---	---	---	---	---
244414_at	---	---	142.713	149.2	112.197	100	290.475	323.15	186.781	75	-1.0375	-2.05267	18.75	64.0625	0.200228	0.0021346	0.00749132	0.0115751	17.1875	21.4286	17.8571	---	---	---	---	---
232670_at	---	---	65.7625	72.55	46.2862	75	167.625	185.75	104.041	75	-1.40156	-2.64188	15.625	64.0625	0.0914372	0.000151659	0.00171144	0.0011065	20.3125	28.5714	14.2857	---	---	---	---	---
232431_at	---	---	219.137	251	111.584	100	353.937	438.05	183.043	100	-0.578125	-1.49291	21.875	62.5	0.40385	0.0270505	0.0423059	0.0807747	15.625	25	50	---	---	---	---	---
222371_at	---	---	406.425	386.5	269.283	100	756.237	872.65	434.261	100	-0.685938	-1.60875	18.75	62.5	0.44788	0.0353148	0.0507201	0.0991559	18.75	14.2857	50	---	---	---	---	---
228173_at	---	---	131.525	136.4	53.0028	100	214.613	250.75	105.193	100	-0.55	-1.46409	18.75	62.5	0.211121	0.0103632	0.0102981	0.057814	18.75	35.7143	28.5714	---	---	---	---	---
238883_at	---	---	237.625	281.15	149.526	100	402.075	464.25	225.411	87.5	-0.648438	-1.56747	18.75	62.5	0.515736	0.075301	0.105395	0.161284	18.75	25	35.7143	---	---	---	---	---
241681_at	---	---	525.775	581.35	337.592	100	850.675	934.2	477.307	100	-0.671875	-1.59314	18.75	62.5	0.400263	0.0372139	0.0617092	0.0947146	18.75	21.4286	28.5714	---	---	---	---	---
230590_at	---	---	142.525	134.55	93.2715	75	320.063	332.9	207.702	75	-0.9125	-1.8823	17.1875	62.5	0.214708	0.00235534	0.00514857	0.0167599	20.3125	25	21.4286	---	---	---	---	---
238712_at	---	---	264.988	332.75	139.314	100	458.225	517.2	246.626	100	-0.729688	-1.65828	17.1875	62.5	0.319696	0.00434514	0.00968488	0.0231555	20.3125	32.1429	28.5714	---	---	---	---	---
234032_at	---	---	130.1	147.1	76.7155	100	212.088	250.75	112.296	100	-0.7	-1.6245	15.625	62.5	0.390669	0.0201665	0.0385719	0.0597732	21.875	32.1429	39.2857	---	---	---	---	---
234151_at	---	---	415.825	533.75	285.344	100	733.15	792.35	410.174	100	-0.84375	-1.79471	15.625	62.5	0.243245	0.0196037	0.0487883	0.0468801	21.875	21.4286	28.5714	---	---	---	---	---
237895_at	---	---	72.7625	77.3	37.915	62.5	133.787	150.45	69.8543	75	-0.607812	-1.52395	15.625	62.5	0.236783	0.0116399	0.0212204	0.0500812	21.875	42.8571	42.8571	---	---	---	---	---
241893_at	---	---	73.55	78.85	47.5077	75	158.5	183.3	89.6928	100	-1.07969	-2.11358	15.625	62.5	0.176419	0.000949805	0.00526332	0.00496853	21.875	28.5714	35.7143	---	---	---	---	---
243869_at	---	---	78.025	80.2	40.6433	50	128.45	146.45	66.6798	75	-0.585937	-1.50101	15.625	62.5	0.306936	0.00881617	0.0280294	0.0255692	21.875	46.4286	42.8571	---	---	---	---	---
244697_at	---	---	170.55	179	108.832	75	359.988	379	258.863	100	-0.904687	-1.87214	25	60.9375	0.224982	0.00987439	0.0243507	0.0345559	14.0625	21.4286	28.5714	---	---	---	---	---
237119_at	---	---	195.6	226.65	124.45	87.5	310.525	360.6	161.256	100	-0.664063	-1.58454	21.875	60.9375	0.354455	0.0382345	0.072044	0.0882868	17.1875	14.2857	32.1429	---	---	---	---	---
1568780_at	---	---	218.363	210.25	118.201	100	371.15	358	211.888	100	-0.595313	-1.5108	18.75	60.9375	0.295073	0.010283	0.0151234	0.0479346	20.3125	32.1429	32.1429	---	---	---	---	---
242405_at	---	---	101.45	100.1	66.3784	100	188.75	189.85	123.702	100	-0.896875	-1.86203	18.75	60.9375	0.333895	0.00493736	0.0133809	0.0213523	20.3125	17.8571	21.4286	---	---	---	---	---
1556744_a_at	---	---	91.5125	86.4	40.1287	100	164.413	174.95	85.4106	100	-0.689063	-1.61224	17.1875	60.9375	0.222513	0.00176236	0.00357526	0.0149216	21.875	32.1429	46.4286	---	---	---	---	---
235757_at	---	---	126.188	155.2	70.598	100	208.987	240.15	110.114	100	-0.659375	-1.5794	17.1875	60.9375	0.364632	0.0243958	0.0408717	0.0732161	21.875	35.7143	39.2857	---	---	---	---	---
243149_at	---	---	99.3875	122.75	57.8589	87.5	163.688	188.3	85.7993	87.5	-0.821875	-1.7677	17.1875	60.9375	0.369735	0.0114923	0.0319642	0.0323413	21.875	25	50	---	---	---	---	---
239175_at	---	---	98.0625	91.2	52.1287	87.5	157.05	171.1	80.1013	75	-0.629687	-1.54723	15.625	60.9375	0.287922	0.00816978	0.0147026	0.0378482	23.4375	32.1429	32.1429	---	---	---	---	---
239166_at	---	---	43.1875	48.3	30.3213	37.5	109.113	121.8	71.4655	75	-0.85625	-1.81033	14.0625	60.9375	0.380537	0.0478543	0.0660747	0.122351	25	46.4286	35.7143	---	---	---	---	---
242457_at	---	---	29.675	20.4	23.4066	37.5	63.45	71.15	39.385	75	-0.684375	-1.60701	6.25	60.9375	0.461974	0.0674682	0.0551481	0.188412	32.8125	57.1429	46.4286	---	---	---	---	---
228854_at	---	---	1089.6	791.2	985.939	100	232.988	170.45	139.075	100	1.50156	2.83149	67.1875	20.3125	0.13493	4.49613e-05	0.00364813	1.05921e-05	12.5	3.57143	39.2857	---	---	---	---	---
227762_at	---	---	832.975	667.05	745.818	87.5	189.462	125.45	152.803	87.5	1.475	2.77984	64.0625	18.75	0.0961314	4.82583e-05	0.00243808	3.53278e-05	17.1875	10.7143	39.2857	---	---	---	---	---
231262_at	---	---	193.137	153.8	177.089	75	36.075	28.25	21.2082	100	1.41406	2.66487	60.9375	7.8125	0.0473339	1.51723e-06	0.000629208	1.50136e-07	31.25	17.8571	71.4286	---	---	---	---	---
228661_s_at	---	---	157.625	133.1	63.7787	100	96	85.7	21.6658	100	0.620313	1.53721	60.9375	4.6875	0.0253465	1.85846e-08	1.92264e-05	2.33715e-08	34.375	32.1429	64.2857	---	---	---	---	---
232862_at	Abhydrolase domain containing 5	ABHD5	150.087	137.55	109.933	87.5	319.112	363	162.924	100	-1	-2	15.625	70.3125	0.104604	0.000473033	0.00147111	0.00553248	14.0625	21.4286	42.8571	chr3p21	0006508 // proteolysis // inferred from electronic annotation /// 0006629 // lipid metabolic process // inferred from electronic annotation /// 0006631 // fatty acid metabolic process // inferred from electronic annotation /// 0006654 // phosphatidic acid	0005737 // cytoplasm // inferred from electronic annotation /// 0005811 // lipid particle // inferred from sequence or structural similarity /// 0005811 // lipid particle // inferred from electronic annotation /// 0005829 // cytosol // inferred from seque	0003841 // 1-acylglycerol-3-phosphate O-acyltransferase activity // inferred from electronic annotation /// 0004177 // aminopeptidase activity // inferred from electronic annotation /// 0004806 // triglyceride lipase activity // inferred from sequence or	---
1558015_s_at	ARP2 actin-related protein 2 homolog (yeast)	ACTR2	383.05	350.2	98.8628	100	279.075	269.3	57.2305	100	0.448437	1.36456	60.9375	0	0.0150591	3.52251e-09	9.79552e-07	2.34751e-07	39.0625	60.7143	71.4286	chr2p14	0006928 // cellular component movement // traceable author statement	0005737 // cytoplasm // inferred from electronic annotation /// 0005856 // cytoskeleton // inferred from electronic annotation /// 0005885 // Arp2/3 protein complex // inferred from reviewed computational analysis /// 0005885 // Arp2/3 protein complex //	0000166 // nucleotide binding // inferred from electronic annotation /// 0003779 // actin binding // inferred from electronic annotation /// 0005515 // protein binding // inferred from physical interaction /// 0005515 // protein binding // inferred from e	---
214895_s_at	ADAM metallopeptidase domain 10	ADAM10	206.838	198.05	46.7811	100	135.85	119.55	49.8022	100	0.754687	1.68727	76.5625	6.25	0.00937057	8.38738e-12	2.45567e-11	1.52325e-07	17.1875	64.2857	42.8571	chr15q2|15q22	0001701 // in utero embryonic development // inferred from sequence or structural similarity /// 0001701 // in utero embryonic development // inferred from electronic annotation /// 0006468 // protein phosphorylation // inferred from sequence or structura	0005634 // nucleus // inferred from sequence or structural similarity /// 0005634 // nucleus // inferred from electronic annotation /// 0005737 // cytoplasm // inferred from sequence or structural similarity /// 0005737 // cytoplasm // inferred from elect	0004175 // endopeptidase activity // inferred from sequence or structural similarity /// 0004175 // endopeptidase activity // inferred from electronic annotation /// 0004222 // metalloendopeptidase activity // non-traceable author statement /// 0004222 //	Hypertrophy_model // GenMAPP
236007_at	A kinase (PRKA) anchor protein 10	AKAP10	362.438	389.55	192.881	100	584.875	679.85	292.153	100	-0.628125	-1.54556	20.3125	64.0625	0.301787	0.0110448	0.0233876	0.0402322	15.625	17.8571	39.2857	chr17p11.1	0007165 // signal transduction // traceable author statement /// 0008104 // protein localization // inferred from electronic annotation /// 0008104 // protein localization // traceable author statement	0005737 // cytoplasm // inferred from electronic annotation /// 0005739 // mitochondrion // inferred from electronic annotation /// 0016020 // membrane // inferred from electronic annotation	0004871 // signal transducer activity // inferred from electronic annotation /// 0016301 // kinase activity // inferred from electronic annotation	G_Protein_Signaling // GenMAPP
201951_at	activated leukocyte cell adhesion molecule	ALCAM	564.288	556.35	138.625	100	306.612	327.05	55.6283	100	0.707813	1.63333	81.25	0	0.000238606	1.4565e-18	1.00439e-13	2.24975e-15	18.75	39.2857	57.1429	chr3q13.1	0007155 // cell adhesion // inferred from electronic annotation /// 0007155 // cell adhesion // traceable author statement /// 0007165 // signal transduction // traceable author statement /// 0007411 // axon guidance // inferred from electronic annotation	0009897 // external side of plasma membrane // inferred from electronic annotation /// 0016020 // membrane // inferred from electronic annotation /// 0016021 // integral to membrane // inferred from electronic annotation /// 0030424 // axon // inferred fr	0005102 // receptor binding // traceable author statement /// 0005515 // protein binding // inferred from electronic annotation	---
201952_at	activated leukocyte cell adhesion molecule	ALCAM	987.413	1031.5	169.842	100	670.975	640.7	104.186	100	0.553125	1.46726	79.6875	0	0.000727053	1.19661e-18	3.74333e-13	1.3597e-15	20.3125	42.8571	64.2857	chr3q13.1	0007155 // cell adhesion // inferred from electronic annotation /// 0007155 // cell adhesion // traceable author statement /// 0007165 // signal transduction // traceable author statement /// 0007411 // axon guidance // inferred from electronic annotation	0009897 // external side of plasma membrane // inferred from electronic annotation /// 0016020 // membrane // inferred from electronic annotation /// 0016021 // integral to membrane // inferred from electronic annotation /// 0030424 // axon // inferred fr	0005102 // receptor binding // traceable author statement /// 0005515 // protein binding // inferred from electronic annotation	---
206714_at	arachidonate 15-lipoxygenase, type B	ALOX15B	154.037	177.75	97.268	87.5	84.9	78.75	31.0577	87.5	0.659375	1.5794	60.9375	15.625	0.239472	0.00103476	0.0170305	0.000670007	23.4375	32.1429	53.5714	chr17p13.1	0006629 // lipid metabolic process // traceable author statement /// 0006631 // fatty acid metabolic process // traceable author statement /// 0006691 // leukotriene metabolic process // inferred from electronic annotation /// 0006917 // induction of apop	0005622 // intracellular // inferred from direct assay /// 0005737 // cytoplasm // inferred from electronic annotation	0005506 // iron ion binding // inferred from electronic annotation /// 0016165 // lipoxygenase activity // inferred from electronic annotation /// 0016165 // lipoxygenase activity // traceable author statement /// 0016491 // oxidoreductase activity // inf	Eicosanoid_Synthesis // GenMAPP
233011_at	Annexin A1	ANXA1	1056.35	943.25	439.763	100	1785.4	1965.45	803.809	100	-0.517188	-1.43116	25	65.625	0.143807	0.00181845	0.0021961	0.0183217	9.375	28.5714	14.2857	chr9q12-q21.2|9q12-q21.2	0006629 // lipid metabolic process // traceable author statement /// 0006916 // anti-apoptosis // traceable author statement /// 0006928 // cellular component movement // traceable author statement /// 0006954 // inflammatory response // traceable author	0001533 // cornified envelope // inferred from direct assay /// 0005576 // extracellular region // not recorded /// 0005634 // nucleus // inferred from electronic annotation /// 0005737 // cytoplasm // inferred from direct assay /// 0005737 // cytoplasm /	0004859 // phospholipase inhibitor activity // traceable author statement /// 0004859 // phospholipase inhibitor activity // inferred from electronic annotation /// 0005102 // receptor binding // traceable author statement /// 0005198 // structural molecu	Prostaglandin_synthesis_regulation // GenMAPP
205239_at	amphiregulin	AREG	3670.05	3897.4	2029.49	100	1903.51	1880.1	1107.76	100	0.89375	1.858	64.0625	18.75	0.0960115	4.67858e-05	0.000837109	0.000319754	17.1875	17.8571	32.1429	chr4q13-q21	0007173 // epidermal growth factor receptor signaling pathway // inferred from direct assay /// 0007186 // G-protein coupled receptor protein signaling pathway // inferred from direct assay /// 0007267 // cell-cell signaling // traceable author statement	0005615 // extracellular space // inferred from direct assay /// 0005615 // extracellular space // inferred from electronic annotation /// 0005615 // extracellular space // traceable author statement /// 0009986 // cell surface // inferred from direct ass	0005125 // cytokine activity // inferred from electronic annotation /// 0008083 // growth factor activity // inferred from electronic annotation /// 0008083 // growth factor activity // traceable author statement	---
1557285_at	Amphiregulin B	AREGB	175.725	151.85	106.155	87.5	90.1125	85.7	35.2265	100	0.540625	1.4546	65.625	12.5	0.236914	0.0160807	0.089297	0.0075622	21.875	28.5714	60.7143	chr4q13.3	0007173 // epidermal growth factor receptor signaling pathway // inferred from direct assay /// 0007186 // G-protein coupled receptor protein signaling pathway // inferred from direct assay /// 0007267 // cell-cell signaling // traceable author statement	0005615 // extracellular space // inferred from direct assay /// 0009986 // cell surface // inferred from direct assay /// 0016020 // membrane // inferred from electronic annotation /// 0016021 // integral to membrane // inferred from electronic annotatio	0005125 // cytokine activity // inferred from electronic annotation /// 0008083 // growth factor activity // inferred from electronic annotation	---
208750_s_at	ADP-ribosylation factor 1	ARF1	548.438	517.4	75.7477	100	312.55	322.4	65.5844	100	0.778125	1.7149	85.9375	0	8.2683e-05	8.91436e-25	1.48574e-22	3.09534e-16	14.0625	60.7143	46.4286	chr1q42	0006810 // transport // inferred from electronic annotation /// 0006890 // retrograde vesicle-mediated transport, Golgi to ER // not recorded /// 0006892 // post-Golgi vesicle-mediated transport // not recorded /// 0007264 // small GTPase mediated signal	0000139 // Golgi membrane // not recorded /// 0005622 // intracellular // inferred from electronic annotation /// 0005737 // cytoplasm // inferred from electronic annotation /// 0005794 // Golgi apparatus // inferred from electronic annotation /// 0005829	0000166 // nucleotide binding // inferred from electronic annotation /// 0003924 // GTPase activity // traceable author statement /// 0005057 // receptor signaling protein activity // traceable author statement /// 0005515 // protein binding // inferred f	---
203311_s_at	ADP-ribosylation factor 6	ARF6	465.813	473.75	63.9523	100	344.675	321.25	61.5964	100	0.414063	1.33243	60.9375	0	0.0019919	2.00992e-17	8.50805e-12	3.55686e-15	39.0625	85.7143	75	chr14q21.3	0001889 // liver development // inferred from electronic annotation /// 0006810 // transport // inferred from electronic annotation /// 0006915 // apoptosis // inferred from electronic annotation /// 0006928 // cellular component movement // traceable aut	0001726 // ruffle // inferred from direct assay /// 0001726 // ruffle // inferred from electronic annotation /// 0005622 // intracellular // inferred from electronic annotation /// 0005624 // membrane fraction // traceable author statement /// 0005737 //	0000166 // nucleotide binding // inferred from electronic annotation /// 0003924 // GTPase activity // traceable author statement /// 0005515 // protein binding // inferred from physical interaction /// 0005515 // protein binding // inferred from electron	---
211672_s_at	actin related protein 2/3 complex, subunit 4, 20kDa	ARPC4	637.75	604.6	120.864	100	461.737	493.75	96.1735	100	0.4625	1.37793	64.0625	0	0.00852898	1.30396e-13	1.83527e-11	1.71887e-09	35.9375	53.5714	57.1429	chr3p25.3	0030041 // actin filament polymerization // inferred from electronic annotation /// 0045010 // actin nucleation // non-traceable author statement	0005737 // cytoplasm // inferred from electronic annotation /// 0005856 // cytoskeleton // inferred from electronic annotation /// 0005885 // Arp2/3 protein complex // inferred from direct assay /// 0042995 // cell projection // inferred from electronic a	0003779 // actin binding // inferred from electronic annotation /// 0005515 // protein binding // inferred from physical interaction /// 0030674 // protein binding, bridging // inferred from physical interaction /// 0051015 // actin filament binding // no	---
1555797_a_at	actin related protein 2/3 complex, subunit 5, 16kDa	ARPC5	892.5	837.7	228.048	100	587.438	562.35	117.683	100	0.54375	1.45776	64.0625	1.5625	0.00383563	9.70989e-13	1.56271e-08	4.95139e-11	34.375	42.8571	67.8571	chr1q25.3	0006928 // cellular component movement // traceable author statement /// 0030036 // actin cytoskeleton organization // traceable author statement /// 0030833 // regulation of actin filament polymerization // inferred from electronic annotation	0005737 // cytoplasm // inferred from electronic annotation /// 0005737 // cytoplasm // traceable author statement /// 0005856 // cytoskeleton // inferred from electronic annotation /// 0005885 // Arp2/3 protein complex // traceable author statement /// 0	0003779 // actin binding // inferred from electronic annotation /// 0005200 // structural constituent of cytoskeleton // traceable author statement /// 0005515 // protein binding // inferred from physical interaction	---
224996_at	aspartate beta-hydroxylase	ASPH	439.113	453.8	106.562	100	283.413	257.85	53.6485	100	0.609375	1.5256	67.1875	3.125	0.00443057	1.41687e-13	6.51753e-09	1.96172e-12	29.6875	42.8571	60.7143	chr8q12.1	0006936 // muscle contraction // traceable author statement /// 0007389 // pattern specification process // inferred from electronic annotation /// 0008285 // negative regulation of cell proliferation // inferred from electronic annotation /// 0018193 //	0005783 // endoplasmic reticulum // inferred from electronic annotation /// 0005783 // endoplasmic reticulum // traceable author statement /// 0005789 // endoplasmic reticulum membrane // inferred from electronic annotation /// 0005789 // endoplasmic reti	0004597 // peptide-aspartate beta-dioxygenase activity // inferred from electronic annotation /// 0004597 // peptide-aspartate beta-dioxygenase activity // traceable author statement /// 0005198 // structural molecule activity // traceable author statemen	---
229389_at	ATG16 autophagy related 16-like 2 (S. cerevisiae)	ATG16L2	852.762	948.75	417.541	100	1400.69	1557.8	693.656	100	-0.51875	-1.43271	18.75	60.9375	0.249607	0.00803503	0.0165833	0.0344617	20.3125	25	32.1429	chr11q13.4	0006810 // transport // inferred from electronic annotation /// 0006914 // autophagy // inferred from electronic annotation /// 0015031 // protein transport // inferred from electronic annotation	0005737 // cytoplasm // inferred from electronic annotation	---	---
201971_s_at	ATPase, H+ transporting, lysosomal 70kDa, V1 subunit A	ATP6V1A	224.188	208.85	43.3201	100	161.012	154.8	30.2063	100	0.564063	1.47843	71.875	0	0.00393934	1.78892e-16	1.1206e-13	1.33627e-11	28.125	71.4286	60.7143	chr3q13.31	0006810 // transport // traceable author statement /// 0006810 // transport // inferred from electronic annotation /// 0006811 // ion transport // inferred from electronic annotation /// 0015986 // ATP synthesis coupled proton transport // inferred from e	0005739 // mitochondrion // inferred from electronic annotation /// 0005829 // cytosol // inferred from sequence or structural similarity /// 0005829 // cytosol // inferred from electronic annotation /// 0005886 // plasma membrane // inferred from sequenc	0000166 // nucleotide binding // inferred from electronic annotation /// 0005524 // ATP binding // inferred from electronic annotation /// 0016787 // hydrolase activity // inferred from electronic annotation /// 0016820 // hydrolase activity, acting on ac	---
219326_s_at	UDP-GlcNAc:betaGal beta-1,3-N-acetylglucosaminyltransferase 2	B3GNT2	193.85	199.35	29.6588	100	133.4	116.8	40.7419	100	0.575	1.48968	71.875	6.25	0.00600359	4.04766e-13	4.42245e-13	7.1674e-08	21.875	71.4286	64.2857	chr2p15	0006486 // protein glycosylation // inferred from electronic annotation /// 0007411 // axon guidance // inferred from electronic annotation /// 0007608 // sensory perception of smell // inferred from electronic annotation	0000139 // Golgi membrane // inferred from electronic annotation /// 0005794 // Golgi apparatus // inferred from electronic annotation /// 0016020 // membrane // inferred from electronic annotation /// 0016021 // integral to membrane // non-traceable auth	0008378 // galactosyltransferase activity // inferred from electronic annotation /// 0008499 // UDP-galactose:beta-N-acetylglucosamine beta-1,3-galactosyltransferase activity // non-traceable author statement /// 0016740 // transferase activity // inferre	---
226517_at	branched chain amino-acid transaminase 1, cytosolic	BCAT1	322.412	299.75	146.176	100	197.175	173.45	72.2703	100	0.717187	1.64397	67.1875	4.6875	0.0265107	1.69235e-10	4.01982e-07	3.08053e-09	28.125	28.5714	64.2857	chr12p12.1	0000082 // G1/S transition of mitotic cell cycle // traceable author statement /// 0008152 // metabolic process // inferred from electronic annotation /// 0008283 // cell proliferation // traceable author statement /// 0008652 // cellular amino acid biosy	0005737 // cytoplasm // inferred from electronic annotation /// 0005739 // mitochondrion // inferred from electronic annotation /// 0005829 // cytosol // not recorded /// 0005829 // cytosol // inferred from electronic annotation	0003824 // catalytic activity // inferred from electronic annotation /// 0004084 // branched-chain-amino-acid transaminase activity // not recorded /// 0004084 // branched-chain-amino-acid transaminase activity // inferred from electronic annotation /// 0	---
205733_at	Bloom syndrome, RecQ helicase-like	BLM	273.975	258.25	87.2168	100	165.238	147.75	81.9925	100	0.778125	1.7149	64.0625	12.5	0.0209513	5.04444e-07	3.27387e-07	0.000203342	23.4375	32.1429	21.4286	chr15q26.1	0000079 // regulation of cyclin-dependent protein kinase activity // inferred from mutant phenotype /// 0000085 // G2 phase of mitotic cell cycle // non-traceable author statement /// 0000723 // telomere maintenance // inferred from electronic annotation	0000781 // chromosome, telomeric region // inferred from direct assay /// 0000800 // lateral element // inferred from direct assay /// 0001673 // male germ cell nucleus // inferred from electronic annotation /// 0005622 // intracellular // inferred from e	0000166 // nucleotide binding // inferred from electronic annotation /// 0000405 // bubble DNA binding // inferred from direct assay /// 0000739 // DNA strand annealing activity // inferred from direct assay /// 0002039 // p53 binding // inferred from phy	---
200776_s_at	basic leucine zipper and W2 domains 1	BZW1	615.462	586.6	123.744	100	430.787	411.5	99.3474	100	0.415625	1.33388	60.9375	0	0.00618704	4.64576e-13	1.57197e-11	8.45078e-09	39.0625	78.5714	46.4286	chr2q33	0006350 // transcription // inferred from electronic annotation /// 0016070 // RNA metabolic process // inferred from electronic annotation /// 0045449 // regulation of transcription // inferred from electronic annotation	0005737 // cytoplasm // inferred from direct assay	0005488 // binding // inferred from electronic annotation /// 0005515 // protein binding // inferred from physical interaction /// 0005515 // protein binding // inferred from electronic annotation	---
44790_s_at	chromosome 13 open reading frame 18	C13orf18	92.3125	80.55	45.2194	100	197.6	159.15	80.0915	100	-0.935937	-1.91313	9.375	70.3125	0.00586173	3.40876e-10	4.28038e-07	1.70758e-08	20.3125	28.5714	28.5714	chr13q14.13	0009966 // regulation of signal transduction // inferred from electronic annotation /// 0043666 // regulation of phosphoprotein phosphatase activity // inferred from electronic annotation	---	0004864 // phosphoprotein phosphatase inhibitor activity // inferred from electronic annotation	---
219471_at	chromosome 13 open reading frame 18	C13orf18	91	91.2	31.6081	25	138.575	128.8	46.1203	100	-0.689063	-1.61224	0	62.5	0.040262	2.84712e-10	5.28452e-08	2.19223e-07	37.5	85.7143	53.5714	chr13q14.13	0009966 // regulation of signal transduction // inferred from electronic annotation /// 0043666 // regulation of phosphoprotein phosphatase activity // inferred from electronic annotation	---	0004864 // phosphoprotein phosphatase inhibitor activity // inferred from electronic annotation	---
1555226_s_at	chromosome 1 open reading frame 43	C1orf43	675.888	662.6	81.1534	100	486.737	450.7	90.4695	100	0.667187	1.58797	79.6875	0	0.0013976	1.76124e-22	4.33065e-19	1.4265e-15	20.3125	57.1429	42.8571	chr1q21.2	---	0016020 // membrane // inferred from electronic annotation /// 0016021 // integral to membrane // inferred from electronic annotation	0016491 // oxidoreductase activity // inferred from electronic annotation /// 0050662 // coenzyme binding // inferred from electronic annotation	---
220477_s_at	chromosome 20 open reading frame 30	C20orf30	462.237	433.55	69.9402	100	323.725	326.35	62.5804	100	0.520313	1.43427	68.75	0	0.0022067	6.45466e-13	2.39325e-11	8.06949e-09	31.25	46.4286	57.1429	chr20p13	---	0016020 // membrane // inferred from electronic annotation /// 0016021 // integral to membrane // inferred from electronic annotation	---	---
220918_at	chromosome 21 open reading frame 96	C21orf96	141.875	165.75	74.6143	100	232.588	272.4	102.961	100	-0.742188	-1.67271	15.625	60.9375	0.180936	0.00306597	0.0136111	0.0102469	23.4375	32.1429	42.8571	chr21q22.12	---	0005829 // cytosol // inferred from direct assay	---	---
209906_at	complement component 3a receptor 1	C3AR1	1132.74	942.35	650.009	100	1538.66	1522.4	427.406	100	-0.58125	-1.49614	15.625	65.625	0.0819719	3.61625e-05	0.00231902	2.54885e-05	18.75	28.5714	42.8571	chr12p13.31	0002430 // complement receptor mediated signaling pathway // inferred from electronic annotation /// 0006935 // chemotaxis // inferred from electronic annotation /// 0006954 // inflammatory response // traceable author statement /// 0007165 // signal tran	0005886 // plasma membrane // not recorded /// 0005886 // plasma membrane // inferred from electronic annotation /// 0005886 // plasma membrane // traceable author statement /// 0005887 // integral to plasma membrane // traceable author statement /// 0016	0001850 // complement component C3a binding // inferred from electronic annotation /// 0004435 // phosphoinositide phospholipase C activity // traceable author statement /// 0004871 // signal transducer activity // inferred from electronic annotation ///	GPCRDB_Class_A_Rhodopsin-like // GenMAPP /// Peptide_GPCRs // GenMAPP
208852_s_at	calnexin	CANX	697.7	713.4	127.701	100	489.738	464.45	99.1821	100	0.467187	1.38241	60.9375	0	0.00380047	9.58382e-16	1.80703e-12	5.15751e-12	39.0625	64.2857	71.4286	chr5q35	0006457 // protein folding // not recorded /// 0006457 // protein folding // inferred from electronic annotation /// 0007568 // aging // inferred from electronic annotation /// 0009306 // protein secretion // traceable author statement	0005622 // intracellular // non-traceable author statement /// 0005737 // cytoplasm // inferred from electronic annotation /// 0005783 // endoplasmic reticulum // inferred from direct assay /// 0005783 // endoplasmic reticulum // inferred from electronic	0005509 // calcium ion binding // inferred from electronic annotation /// 0005509 // calcium ion binding // traceable author statement /// 0005509 // calcium ion binding // non-traceable author statement /// 0005515 // protein binding // inferred from phy	---
1553693_s_at	carbonyl reductase 4	CBR4	56.6	55.3	26.6386	100	88.175	102.55	43.2023	87.5	-0.414062	-1.33243	17.1875	60.9375	0.416195	0.0430721	0.0394061	0.138239	21.875	60.7143	46.4286	chr4q32.3	0006633 // fatty acid biosynthetic process // inferred from electronic annotation /// 0008152 // metabolic process // inferred from electronic annotation /// 0008610 // lipid biosynthetic process // inferred from electronic annotation /// 0051289 // prote	0005739 // mitochondrion // inferred from electronic annotation /// 0005759 // mitochondrial matrix // inferred from direct assay /// 0005759 // mitochondrial matrix // inferred from sequence or structural similarity /// 0005759 // mitochondrial matrix //	0003824 // catalytic activity // inferred from electronic annotation /// 0005488 // binding // inferred from electronic annotation /// 0005515 // protein binding // inferred from physical interaction /// 0008753 // NADPH dehydrogenase (quinone) activity /	---
242197_x_at	CD36 molecule (thrombospondin receptor)	CD36	171.613	172.45	111.597	100	369.375	404.7	203.295	100	-0.99375	-1.99135	14.0625	73.4375	0.144532	5.85645e-05	0.00037369	0.000961484	12.5	25	39.2857	chr7q11.2	0001954 // positive regulation of cell-matrix adhesion // inferred from direct assay /// 0006629 // lipid metabolic process // non-traceable author statement /// 0006810 // transport // inferred from electronic annotation /// 0006910 // phagocytosis, reco	0005624 // membrane fraction // traceable author statement /// 0005794 // Golgi apparatus // inferred from direct assay /// 0005794 // Golgi apparatus // inferred from electronic annotation /// 0005886 // plasma membrane // not recorded /// 0005886 // pla	0004872 // receptor activity // inferred from electronic annotation /// 0005041 // low-density lipoprotein receptor activity // inferred from mutant phenotype /// 0005041 // low-density lipoprotein receptor activity // traceable author statement /// 00050	---
242268_at	CUGBP, Elav-like family member 2	CELF2	694.8	826.05	441.313	100	1098.89	1242.75	652.459	100	-0.679688	-1.60179	21.875	60.9375	0.373472	0.0321446	0.0693625	0.0707211	17.1875	14.2857	17.8571	chr10p13	0006376 // mRNA splice site selection // inferred from electronic annotation /// 0006396 // RNA processing // traceable author statement /// 0006397 // mRNA processing // inferred from electronic annotation /// 0008016 // regulation of heart contraction /	0005625 // soluble fraction // inferred from electronic annotation /// 0005634 // nucleus // inferred from electronic annotation /// 0005737 // cytoplasm // inferred from electronic annotation	0000166 // nucleotide binding // inferred from electronic annotation /// 0003676 // nucleic acid binding // inferred from electronic annotation /// 0003723 // RNA binding // inferred from electronic annotation /// 0003723 // RNA binding // traceable autho	mRNA_processing_Reactome // GenMAPP
209616_s_at	carboxylesterase 1	CES1	3118.35	3316.35	1158.97	100	2096.1	1714.5	1229.74	100	0.610938	1.52725	68.75	18.75	0.244422	0.00402667	0.0180931	0.0118373	12.5	39.2857	17.8571	chr16q22.2	0008152 // metabolic process // traceable author statement /// 0009636 // response to toxin // traceable author statement	0005783 // endoplasmic reticulum // inferred from electronic annotation /// 0005788 // endoplasmic reticulum lumen // inferred from electronic annotation	0004091 // carboxylesterase activity // inferred from electronic annotation /// 0004091 // carboxylesterase activity // traceable author statement /// 0016787 // hydrolase activity // inferred from electronic annotation	Irinotecan_pathway_PharmGKB // GenMAPP
239629_at	CASP8 and FADD-like apoptosis regulator	CFLAR	285.375	296.35	160.298	100	454.013	526.15	227.169	100	-0.565625	-1.48003	20.3125	60.9375	0.348481	0.0177005	0.0315307	0.0600659	18.75	25	17.8571	chr2q33-q34	0006508 // proteolysis // inferred from electronic annotation /// 0006915 // apoptosis // inferred from electronic annotation /// 0006916 // anti-apoptosis // inferred from mutant phenotype /// 0006916 // anti-apoptosis // inferred from electronic annotat	---	0004197 // cysteine-type endopeptidase activity // inferred from electronic annotation /// 0005515 // protein binding // inferred from physical interaction /// 0005515 // protein binding // inferred from electronic annotation /// 0008234 // cysteine-type	---
1559739_at	Choline phosphotransferase 1	CHPT1	154.1	152.9	83.6797	87.5	330.238	348.6	205.633	100	-0.998437	-1.99784	18.75	68.75	0.165122	0.00043244	0.00252551	0.00306581	12.5	25	21.4286	chr12q	0001558 // regulation of cell growth // non-traceable author statement /// 0006629 // lipid metabolic process // traceable author statement /// 0006656 // phosphatidylcholine biosynthetic process // inferred from direct assay /// 0006657 // CDP-choline pa	0000139 // Golgi membrane // inferred from electronic annotation /// 0005792 // microsome // non-traceable author statement /// 0005794 // Golgi apparatus // inferred from electronic annotation /// 0016020 // membrane // non-traceable author statement ///	0004142 // diacylglycerol cholinephosphotransferase activity // inferred from direct assay /// 0004142 // diacylglycerol cholinephosphotransferase activity // inferred from electronic annotation /// 0016740 // transferase activity // inferred from electro	---
208792_s_at	clusterin	CLU	333.5	267.45	247.761	100	129.837	104.4	61.7032	75	1.07813	2.11129	67.1875	15.625	0.0772375	7.2259e-06	0.000677437	1.23653e-05	17.1875	14.2857	32.1429	chr8p21-p12	0001836 // release of cytochrome c from mitochondria // inferred by curator /// 0006629 // lipid metabolic process // non-traceable author statement /// 0006915 // apoptosis // inferred from electronic annotation /// 0006916 // anti-apoptosis // inferred	0005576 // extracellular region // inferred from electronic annotation /// 0005615 // extracellular space // inferred from direct assay /// 0005739 // mitochondrion // inferred from direct assay /// 0016235 // aggresome // inferred from electronic annotat	0005515 // protein binding // inferred from physical interaction /// 0005515 // protein binding // inferred from electronic annotation /// 0051787 // misfolded protein binding // inferred from physical interaction	---
208791_at	clusterin	CLU	273.763	246.15	209.156	87.5	90.6	85.65	52.1596	75	1.44531	2.72322	65.625	14.0625	0.0586318	3.54754e-06	4.87697e-05	0.000190213	20.3125	10.7143	35.7143	chr8p21-p12	0001836 // release of cytochrome c from mitochondria // inferred by curator /// 0006629 // lipid metabolic process // non-traceable author statement /// 0006915 // apoptosis // inferred from electronic annotation /// 0006916 // anti-apoptosis // inferred	0005576 // extracellular region // inferred from electronic annotation /// 0005615 // extracellular space // inferred from direct assay /// 0005739 // mitochondrion // inferred from direct assay /// 0016235 // aggresome // inferred from electronic annotat	0005515 // protein binding // inferred from physical interaction /// 0005515 // protein binding // inferred from electronic annotation /// 0051787 // misfolded protein binding // inferred from physical interaction	---
222858_s_at	dual adaptor of phosphotyrosine and 3-phosphoinositides	DAPP1	808.437	786.5	182.281	100	1065.21	1044.2	177.614	100	-0.410938	-1.32955	1.5625	60.9375	0.0182922	2.25804e-11	3.51478e-08	2.74455e-09	37.5	60.7143	53.5714	chr4q25-q27	0006470 // protein dephosphorylation // non-traceable author statement /// 0007165 // signal transduction // traceable author statement	0005737 // cytoplasm // inferred from electronic annotation /// 0005886 // plasma membrane // inferred from direct assay /// 0016020 // membrane // inferred from electronic annotation	0004725 // protein tyrosine phosphatase activity // non-traceable author statement /// 0005515 // protein binding // inferred from electronic annotation /// 0005543 // phospholipid binding // non-traceable author statement /// 0005547 // phosphatidylinosi	---
202887_s_at	DNA-damage-inducible transcript 4	DDIT4	1261.39	1266.45	516.462	100	773.675	827.5	312.116	100	0.640625	1.559	64.0625	9.375	0.0535679	1.56976e-05	0.000270358	0.000247549	26.5625	35.7143	14.2857	chr10pter-q26.12	0001666 // response to hypoxia // inferred from electronic annotation /// 0006915 // apoptosis // inferred from electronic annotation /// 0009968 // negative regulation of signal transduction // inferred from electronic annotation	0005622 // intracellular // inferred from direct assay /// 0005737 // cytoplasm // inferred from direct assay /// 0005737 // cytoplasm // inferred from electronic annotation	---	---
207759_s_at	disrupted in schizophrenia 1 /// translin-associated factor X /// TSNAX-DISC1 gene	DISC1 /// TSNAX /// TSNAX-DISC1	45.2625	43.35	21.4432	75	96.4625	105.5	50.0515	75	-0.826563	-1.77345	17.1875	62.5	0.0900562	0.000248475	0.000417058	0.00459938	20.3125	50	39.2857	chr1q42.1	0000226 // microtubule cytoskeleton organization // inferred from mutant phenotype /// 0001764 // neuron migration // inferred from mutant phenotype /// 0002052 // positive regulation of neuroblast proliferation // inferred from genetic interaction /// 00	0005634 // nucleus // inferred from electronic annotation /// 0005737 // cytoplasm // inferred from electronic annotation /// 0005813 // centrosome // inferred from direct assay /// 0005813 // centrosome // inferred from electronic annotation /// 0005815	0003677 // DNA binding // traceable author statement /// 0005515 // protein binding // inferred from physical interaction /// 0005515 // protein binding // inferred from electronic annotation /// 0008565 // protein transporter activity // traceable author	---
208811_s_at	DnaJ (Hsp40) homolog, subfamily B, member 6 /// transmembrane protein 135	DNAJB6 /// TMEM135	522.075	531.9	68.6518	100	406.663	357.9	98.7386	100	0.45625	1.37197	71.875	0	0.0206285	5.84229e-23	1.03839e-20	3.20001e-15	28.125	89.2857	71.4286	chr11q14.2 /// chr7q36.3	0006457 // protein folding // inferred from direct assay /// 0006986 // response to unfolded protein // non-traceable author statement /// 0043154 // negative regulation of caspase activity // inferred from direct assay /// 0045109 // intermediate filamen	0005634 // nucleus // inferred from direct assay /// 0005634 // nucleus // inferred from electronic annotation /// 0005737 // cytoplasm // inferred from electronic annotation /// 0016020 // membrane // inferred from electronic annotation /// 0016021 // in	0001671 // ATPase activator activity // inferred from direct assay /// 0003677 // DNA binding // inferred from electronic annotation /// 0005515 // protein binding // inferred from physical interaction /// 0005515 // protein binding // inferred from elect	---
227808_at	DnaJ (Hsp40) homolog, subfamily C, member 15	DNAJC15	288.913	290.4	60.3676	100	184.6	177.45	46.0193	100	0.61875	1.53554	68.75	4.6875	0.00311919	3.54405e-11	1.82951e-09	1.53745e-07	26.5625	39.2857	42.8571	chr13q14.1	---	0005739 // mitochondrion // inferred from electronic annotation /// 0016020 // membrane // inferred from electronic annotation /// 0016021 // integral to membrane // inferred from electronic annotation	0031072 // heat shock protein binding // inferred from electronic annotation	---
1556053_at	DnaJ (Hsp40) homolog, subfamily C, member 7	DNAJC7	189.138	200.35	84.4716	100	279.088	342.05	130.482	100	-0.451562	-1.36752	17.1875	62.5	0.419405	0.0390125	0.043907	0.118805	20.3125	39.2857	57.1429	chr17q11.2	0006457 // protein folding // traceable author statement /// 0070389 // chaperone cofactor-dependent protein refolding // inferred from direct assay	0005634 // nucleus // inferred from electronic annotation /// 0005737 // cytoplasm // inferred from direct assay /// 0005737 // cytoplasm // inferred from electronic annotation /// 0005856 // cytoskeleton // inferred from electronic annotation	0005488 // binding // inferred from electronic annotation /// 0031072 // heat shock protein binding // inferred from physical interaction /// 0031072 // heat shock protein binding // inferred from electronic annotation	---
201044_x_at	dual specificity phosphatase 1	DUSP1	655.863	646.75	222.796	100	347.938	352.35	144.504	100	0.896875	1.86203	75	7.8125	0.0190373	1.00506e-09	1.77746e-08	1.09936e-06	17.1875	35.7143	32.1429	chr5q34	0006470 // protein dephosphorylation // inferred from electronic annotation /// 0006950 // response to stress // inferred from electronic annotation /// 0006979 // response to oxidative stress // traceable author statement /// 0007049 // cell cycle // inf	0005625 // soluble fraction // inferred from electronic annotation /// 0005634 // nucleus // inferred from electronic annotation	0004721 // phosphoprotein phosphatase activity // inferred from electronic annotation /// 0004725 // protein tyrosine phosphatase activity // inferred from electronic annotation /// 0004726 // non-membrane spanning protein tyrosine phosphatase activity //	---
201019_s_at	eukaryotic translation initiation factor 1A, X-linked	EIF1AX	2551.85	2507.95	499.179	100	1812.25	1740.1	416.279	100	0.423437	1.34112	64.0625	3.125	0.00798846	7.38458e-10	1.34048e-08	1.23173e-06	32.8125	50	35.7143	chrXp22.12	0006412 // translation // inferred from electronic annotation /// 0006413 // translational initiation // traceable author statement /// 0006413 // translational initiation // inferred from electronic annotation	0005737 // cytoplasm // inferred from direct assay /// 0005829 // cytosol // not recorded	0003723 // RNA binding // inferred from electronic annotation /// 0003743 // translation initiation factor activity // inferred from electronic annotation /// 0008135 // translation factor activity, nucleic acid binding // traceable author statement	Translation_Factors // GenMAPP
201017_at	eukaryotic translation initiation factor 1A, X-linked	EIF1AX	518.8	510.35	78.5497	100	365.337	346.55	69.5089	100	0.501563	1.41575	67.1875	0	0.00156723	2.67902e-14	6.5168e-12	1.2854e-09	32.8125	75	57.1429	chrXp22.12	0006412 // translation // inferred from electronic annotation /// 0006413 // translational initiation // traceable author statement /// 0006413 // translational initiation // inferred from electronic annotation	0005737 // cytoplasm // inferred from direct assay /// 0005829 // cytosol // not recorded	0003723 // RNA binding // inferred from electronic annotation /// 0003743 // translation initiation factor activity // inferred from electronic annotation /// 0008135 // translation factor activity, nucleic acid binding // traceable author statement	Translation_Factors // GenMAPP
205321_at	eukaryotic translation initiation factor 2, subunit 3 gamma, 52kDa	EIF2S3	539.925	547.6	75.0378	100	399.212	400.5	58.9948	100	0.423437	1.34112	60.9375	0	0.00159059	1.11675e-13	1.75729e-10	4.29902e-10	39.0625	60.7143	64.2857	chrXp22.2-p22.1	0006412 // translation // inferred from electronic annotation /// 0006413 // translational initiation // inferred from direct assay	0005829 // cytosol // not recorded	0000166 // nucleotide binding // inferred from electronic annotation /// 0003743 // translation initiation factor activity // inferred from direct assay /// 0003743 // translation initiation factor activity // inferred from electronic annotation /// 00039	Translation_Factors // GenMAPP
238461_at	eukaryotic translation initiation factor 4E family member 3	EIF4E3	235.625	232.1	72.7622	100	108.25	93.85	47.3828	100	1.03438	2.04823	76.5625	3.125	0.00158241	2.0603e-14	1.51028e-10	1.33206e-11	20.3125	39.2857	53.5714	chr3p14	0006412 // translation // inferred from electronic annotation /// 0006413 // translational initiation // inferred from electronic annotation /// 0006417 // regulation of translation // inferred from electronic annotation	0005737 // cytoplasm // inferred from electronic annotation /// 0005845 // mRNA cap binding complex // inferred from sequence or structural similarity	0003723 // RNA binding // inferred from electronic annotation /// 0003743 // translation initiation factor activity // inferred from electronic annotation	---
201123_s_at	eukaryotic translation initiation factor 5A	EIF5A	995.9	922.1	273.539	100	598.412	644.95	205.694	100	0.7	1.6245	73.4375	3.125	0.0107308	4.86101e-10	6.09239e-09	7.99816e-07	23.4375	35.7143	25	chr17p13-p12	0006406 // mRNA export from nucleus // inferred from mutant phenotype /// 0006412 // translation // inferred from electronic annotation /// 0006452 // translational frameshifting // inferred from electronic annotation /// 0006611 // protein export from nu	0005634 // nucleus // inferred from direct assay /// 0005634 // nucleus // inferred from electronic annotation /// 0005642 // annulate lamellae // inferred from direct assay /// 0005643 // nuclear pore // inferred from direct assay /// 0005643 // nuclear	0003723 // RNA binding // inferred from direct assay /// 0003723 // RNA binding // inferred from electronic annotation /// 0003743 // translation initiation factor activity // inferred from electronic annotation /// 0003746 // translation elongation facto	Translation_Factors // GenMAPP
55692_at	engulfment and cell motility 2	ELMO2	361.112	354.25	52.3498	100	471.913	473.1	42.5874	100	-0.359375	-1.28287	0	64.0625	0.00104652	3.33001e-15	4.11085e-11	2.86295e-12	35.9375	75	82.1429	chr20q13	0006909 // phagocytosis // inferred from electronic annotation /// 0006915 // apoptosis // inferred from electronic annotation	0005737 // cytoplasm // inferred from electronic annotation /// 0005856 // cytoskeleton // inferred from electronic annotation	0005488 // binding // inferred from electronic annotation /// 0017124 // SH3 domain binding // inferred from electronic annotation	---
201324_at	epithelial membrane protein 1	EMP1	186.05	179.75	73.1551	100	103.938	86.15	42.3492	100	0.767187	1.70195	67.1875	4.6875	0.0431702	3.08822e-07	4.68154e-05	2.15748e-06	28.125	42.8571	53.5714	chr12p12.3	0007275 // multicellular organismal development // traceable author statement /// 0008283 // cell proliferation // traceable author statement /// 0008544 // epidermis development // traceable author statement /// 0016049 // cell growth // inferred from el	0005624 // membrane fraction // traceable author statement /// 0005886 // plasma membrane // inferred from electronic annotation /// 0016020 // membrane // inferred from electronic annotation /// 0016021 // integral to membrane // inferred from electronic	---	---
217294_s_at	enolase 1, (alpha)	ENO1	1825.34	1484.3	676.671	100	960.913	984.65	328.334	100	0.964063	1.9508	64.0625	0	0.007679	1.24985e-13	2.64588e-11	6.10664e-10	35.9375	35.7143	35.7143	chr1p36.2	0000122 // negative regulation of transcription from RNA polymerase II promoter // traceable author statement /// 0006096 // glycolysis // inferred from electronic annotation /// 0006350 // transcription // inferred from electronic annotation /// 0008152	0000015 // phosphopyruvate hydratase complex // inferred from electronic annotation /// 0005634 // nucleus // inferred by curator /// 0005634 // nucleus // inferred from electronic annotation /// 0005737 // cytoplasm // inferred from direct assay /// 0005	0000287 // magnesium ion binding // inferred from electronic annotation /// 0003677 // DNA binding // inferred from electronic annotation /// 0003700 // sequence-specific DNA binding transcription factor activity // traceable author statement /// 0003714	Glycolysis_and_Gluconeogenesis // GenMAPP
226431_at	family with sequence similarity 117, member B	FAM117B	970.25	891.75	391.626	100	596.862	570.85	240.452	100	0.675	1.5966	62.5	10.9375	0.0526843	2.46368e-06	7.48644e-05	4.89229e-05	26.5625	17.8571	25	chr2q33.2	---	---	---	---
206848_at	family with sequence similarity 36, member A /// homeobox A7	FAM36A /// HOXA7	151.388	171.15	53.1894	100	210.962	249.95	76.0306	100	-0.609375	-1.5256	15.625	65.625	0.199179	0.000272803	0.00136512	0.00283488	18.75	39.2857	35.7143	chr1q44 /// chr7p15.2	0000122 // negative regulation of transcription from RNA polymerase II promoter // inferred from direct assay /// 0000122 // negative regulation of transcription from RNA polymerase II promoter // inferred from electronic annotation /// 0001525 // angioge	0005634 // nucleus // inferred by curator /// 0005634 // nucleus // inferred from electronic annotation /// 0016020 // membrane // inferred from electronic annotation /// 0016021 // integral to membrane // inferred from electronic annotation	0003677 // DNA binding // inferred from electronic annotation /// 0003700 // sequence-specific DNA binding transcription factor activity // inferred from electronic annotation /// 0005515 // protein binding // inferred from electronic annotation /// 00081	---
215719_x_at	Fas (TNF receptor superfamily, member 6)	FAS	262.088	256	71.3125	100	174.825	159	57.2008	100	0.571875	1.48645	64.0625	4.6875	0.0175425	2.9515e-09	7.25623e-08	1.76072e-06	31.25	39.2857	35.7143	chr10q24.1	0001666 // response to hypoxia // inferred from electronic annotation /// 0002377 // immunoglobulin production // inferred from electronic annotation /// 0003014 // renal system process // inferred from electronic annotation /// 0006461 // protein complex	0005576 // extracellular region // inferred from electronic annotation /// 0005625 // soluble fraction // traceable author statement /// 0005829 // cytosol // non-traceable author statement /// 0005886 // plasma membrane // not recorded /// 0005886 // pla	0004871 // signal transducer activity // traceable author statement /// 0004872 // receptor activity // non-traceable author statement /// 0004872 // receptor activity // inferred from electronic annotation /// 0004872 // receptor activity // traceable au	Apoptosis // GenMAPP /// Apoptosis_GenMAPP // GenMAPP /// Apoptosis_KEGG // GenMAPP
215602_at	FYVE, RhoGEF and PH domain containing 2	FGD2	131.975	124	79.8687	100	232.313	209	133.354	100	-0.7625	-1.69643	18.75	62.5	0.203776	0.00143935	0.00507181	0.00921312	18.75	21.4286	17.8571	chr6p21.2	0006915 // apoptosis // not recorded /// 0007010 // cytoskeleton organization // inferred from sequence or structural similarity /// 0008360 // regulation of cell shape // inferred from sequence or structural similarity /// 0008624 // induction of apoptos	0001726 // ruffle // inferred from sequence or structural similarity /// 0005622 // intracellular // inferred from electronic annotation /// 0005634 // nucleus // inferred from electronic annotation /// 0005737 // cytoplasm // inferred from sequence or st	0005085 // guanyl-nucleotide exchange factor activity // not recorded /// 0005085 // guanyl-nucleotide exchange factor activity // inferred from sequence or structural similarity /// 0005085 // guanyl-nucleotide exchange factor activity // inferred from e	---
204560_at	FK506 binding protein 5	FKBP5	236.813	229.45	147.552	100	106.6	98.95	73.5576	75	1.11563	2.16689	62.5	15.625	0.0792816	4.27362e-06	9.37393e-05	0.00010779	21.875	28.5714	21.4286	chr6p21.31	0006457 // protein folding // inferred from electronic annotation /// 0006457 // protein folding // traceable author statement	0005634 // nucleus // inferred from electronic annotation /// 0005737 // cytoplasm // inferred from electronic annotation	0003755 // peptidyl-prolyl cis-trans isomerase activity // inferred from electronic annotation /// 0005488 // binding // inferred from electronic annotation /// 0005515 // protein binding // inferred from physical interaction /// 0005515 // protein bindin	---
224840_at	FK506 binding protein 5	FKBP5	6831	7334.35	2870.02	100	4337.75	3627	1720.22	100	0.571875	1.48645	64.0625	14.0625	0.104716	6.38965e-05	0.00181407	0.00020069	21.875	25	21.4286	chr6p21.31	0006457 // protein folding // inferred from electronic annotation /// 0006457 // protein folding // traceable author statement	0005634 // nucleus // inferred from electronic annotation /// 0005737 // cytoplasm // inferred from electronic annotation	0003755 // peptidyl-prolyl cis-trans isomerase activity // inferred from electronic annotation /// 0005488 // binding // inferred from electronic annotation /// 0005515 // protein binding // inferred from physical interaction /// 0005515 // protein bindin	---
224856_at	FK506 binding protein 5	FKBP5	2808.71	2512.9	1476.5	100	1424.39	1135.25	689.36	100	0.829687	1.7773	71.875	12.5	0.0560309	3.11943e-06	0.000238861	1.52711e-05	15.625	17.8571	14.2857	chr6p21.31	0006457 // protein folding // inferred from electronic annotation /// 0006457 // protein folding // traceable author statement	0005634 // nucleus // inferred from electronic annotation /// 0005737 // cytoplasm // inferred from electronic annotation	0003755 // peptidyl-prolyl cis-trans isomerase activity // inferred from electronic annotation /// 0005488 // binding // inferred from electronic annotation /// 0005515 // protein binding // inferred from physical interaction /// 0005515 // protein bindin	---
206674_at	fms-related tyrosine kinase 3	FLT3	526.725	507.6	263.574	100	130.45	125.1	45.8586	100	1.74531	3.35267	87.5	6.25	0.000368578	1.33232e-18	1.55711e-11	9.68686e-18	6.25	14.2857	46.4286	chr13q12	0002318 // myeloid progenitor cell differentiation // inferred from electronic annotation /// 0002320 // lymphoid progenitor cell differentiation // inferred from electronic annotation /// 0002328 // pro-B cell differentiation // inferred from electronic	0005887 // integral to plasma membrane // traceable author statement /// 0009986 // cell surface // inferred from electronic annotation /// 0016020 // membrane // inferred from electronic annotation /// 0016021 // integral to membrane // inferred from ele	0000166 // nucleotide binding // inferred from electronic annotation /// 0004672 // protein kinase activity // inferred from electronic annotation /// 0004713 // protein tyrosine kinase activity // inferred from electronic annotation /// 0004714 // transm	---
210773_s_at	formyl peptide receptor 2	FPR2	702.788	717.25	216.186	100	480.113	458.6	132.503	100	0.564062	1.47843	67.1875	12.5	0.0343481	1.79895e-07	2.91852e-05	2.29678e-06	20.3125	28.5714	42.8571	chr19q13.3-q13.4	0006928 // cellular component movement // traceable author statement /// 0006935 // chemotaxis // inferred from electronic annotation /// 0006935 // chemotaxis // traceable author statement /// 0006954 // inflammatory response // traceable author statemen	0005886 // plasma membrane // not recorded /// 0005886 // plasma membrane // inferred from electronic annotation /// 0005886 // plasma membrane // traceable author statement /// 0016020 // membrane // inferred from electronic annotation /// 0016021 // int	0004871 // signal transducer activity // inferred from electronic annotation /// 0004872 // receptor activity // inferred from electronic annotation /// 0004930 // G-protein coupled receptor activity // inferred from electronic annotation /// 0004930 // G	GPCRDB_Class_A_Rhodopsin-like // GenMAPP /// Peptide_GPCRs // GenMAPP
1559101_at	FYN oncogene related to SRC, FGR, YES	FYN	207.25	245	134.961	100	336.538	363.65	203.515	100	-0.740625	-1.6709	17.1875	60.9375	0.356053	0.0140107	0.0429318	0.0316292	21.875	21.4286	35.7143	chr6q21	0001764 // neuron migration // inferred from electronic annotation /// 0006468 // protein phosphorylation // non-traceable author statement /// 0006468 // protein phosphorylation // inferred from electronic annotation /// 0006468 // protein phosphorylatio	0005740 // mitochondrial envelope // inferred from electronic annotation /// 0005768 // endosome // inferred from direct assay /// 0005829 // cytosol // not recorded /// 0005886 // plasma membrane // inferred from direct assay /// 0005886 // plasma membra	0000166 // nucleotide binding // inferred from electronic annotation /// 0001948 // glycoprotein binding // inferred from physical interaction /// 0004672 // protein kinase activity // inferred from electronic annotation /// 0004713 // protein tyrosine ki	Integrin-mediated_cell_adhesion_KEGG // GenMAPP
200008_s_at	GDP dissociation inhibitor 2	GDI2	948.137	929.6	119.542	100	675.275	665.9	153.293	100	0.440625	1.35719	64.0625	1.5625	0.00332042	1.40523e-14	6.31391e-14	3.09308e-09	34.375	60.7143	39.2857	chr10p15	0007165 // signal transduction // traceable author statement /// 0007264 // small GTPase mediated signal transduction // inferred from electronic annotation /// 0015031 // protein transport // inferred from electronic annotation /// 0043087 // regulation	0005737 // cytoplasm // traceable author statement /// 0005737 // cytoplasm // inferred from electronic annotation /// 0005794 // Golgi apparatus // inferred from electronic annotation /// 0009986 // cell surface // inferred from direct assay /// 0016020	0005093 // Rab GDP-dissociation inhibitor activity // inferred from electronic annotation /// 0005093 // Rab GDP-dissociation inhibitor activity // traceable author statement /// 0005096 // GTPase activator activity // inferred from electronic annotation	---
205419_at	G protein-coupled receptor 183	GPR183	2078.03	1524.2	1011.48	100	1382.42	1243.1	684.142	100	0.539062	1.45303	60.9375	18.75	0.148681	0.000810154	0.00594855	0.00384536	20.3125	25	17.8571	chr13q32.3	0002313 // mature B cell differentiation involved in immune response // inferred from sequence or structural similarity /// 0002313 // mature B cell differentiation involved in immune response // inferred from electronic annotation /// 0006955 // immune r	0005886 // plasma membrane // inferred from electronic annotation /// 0005887 // integral to plasma membrane // traceable author statement /// 0016020 // membrane // inferred from electronic annotation /// 0016021 // integral to membrane // inferred from	0004871 // signal transducer activity // inferred from electronic annotation /// 0004872 // receptor activity // inferred from electronic annotation /// 0004930 // G-protein coupled receptor activity // inferred from electronic annotation /// 0004930 // G	GPCRDB_Other // GenMAPP
215470_at	general transcription factor IIH, polypeptide 2B	GTF2H2B	65.2875	63.8	25.0775	100	146.412	152.95	97.2667	87.5	-0.770313	-1.70564	7.8125	60.9375	0.267916	0.0034948	0.00186731	0.035264	31.25	50	25	chr5q13.2	---	---	---	---
211696_x_at	hemoglobin, beta	HBB	2909.51	3296.25	2005.83	100	1608.75	1439.4	981.346	100	0.670312	1.59142	60.9375	29.6875	0.404363	0.0328035	0.0889263	0.0546405	9.375	10.7143	7.14286	chr11p15.5	0006810 // transport // inferred from electronic annotation /// 0008217 // regulation of blood pressure // inferred from electronic annotation /// 0015671 // oxygen transport // non-traceable author statement /// 0015671 // oxygen transport // traceable a	0005833 // hemoglobin complex // non-traceable author statement /// 0005833 // hemoglobin complex // traceable author statement /// 0005833 // hemoglobin complex // inferred from electronic annotation	0005344 // oxygen transporter activity // non-traceable author statement /// 0005344 // oxygen transporter activity // inferred from electronic annotation /// 0005506 // iron ion binding // inferred from electronic annotation /// 0005515 // protein bindin	---
203974_at	haloacid dehalogenase-like hydrolase domain containing 1	HDHD1	817.45	800.15	175.63	100	579.975	548.1	136.17	100	0.485938	1.4005	65.625	1.5625	0.0111058	2.77852e-10	2.62521e-08	1.89662e-07	32.8125	42.8571	50	chrXp22.32	0008152 // metabolic process // inferred from electronic annotation	---	0003824 // catalytic activity // inferred from electronic annotation /// 0016787 // hydrolase activity // inferred from electronic annotation	---
213470_s_at	heterogeneous nuclear ribonucleoprotein H1 (H)	HNRNPH1	212.413	197.6	59.6845	100	122.15	123.1	33.752	100	0.709375	1.6351	68.75	0	0.00396728	5.64533e-14	5.41199e-10	3.55544e-11	31.25	71.4286	78.5714	chr5q35.3	0006396 // RNA processing // traceable author statement /// 0006397 // mRNA processing // inferred from electronic annotation /// 0008380 // RNA splicing // not recorded /// 0008380 // RNA splicing // inferred from electronic annotation /// 0043484 // reg	0005634 // nucleus // inferred from direct assay /// 0005634 // nucleus // inferred from electronic annotation /// 0005634 // nucleus // traceable author statement /// 0005654 // nucleoplasm // inferred from electronic annotation /// 0005681 // spliceosom	0000166 // nucleotide binding // inferred from electronic annotation /// 0003676 // nucleic acid binding // inferred from electronic annotation /// 0003723 // RNA binding // inferred from direct assay /// 0003723 // RNA binding // inferred from electronic	mRNA_processing_Reactome // GenMAPP
1554678_s_at	heterogeneous nuclear ribonucleoprotein D-like	HNRPDL	1483.61	1444.85	246.157	100	1124.97	1084.35	212.369	100	0.414063	1.33243	60.9375	6.25	0.00818583	3.46153e-10	1.97671e-07	4.1323e-08	32.8125	53.5714	60.7143	chr4q21.22	0006350 // transcription // inferred from electronic annotation /// 0006396 // RNA processing // traceable author statement /// 0045449 // regulation of transcription // inferred from electronic annotation	0005634 // nucleus // inferred from electronic annotation /// 0005634 // nucleus // traceable author statement /// 0005737 // cytoplasm // inferred from electronic annotation /// 0030529 // ribonucleoprotein complex // inferred from electronic annotation	0000166 // nucleotide binding // inferred from electronic annotation /// 0003676 // nucleic acid binding // inferred from electronic annotation /// 0003677 // DNA binding // inferred from electronic annotation /// 0003690 // double-stranded DNA binding //	---
211597_s_at	HOP homeobox	HOPX	78.2	73	36.0191	75	13.3	9.1	6.98212	0	2.36094	5.13704	71.875	0	7.1006e-06	1.34651e-33	1.53041e-25	7.09271e-22	28.125	39.2857	96.4286	chr4q12	0001829 // trophectodermal cell differentiation // inferred from direct assay /// 0006350 // transcription // inferred from electronic annotation /// 0006355 // regulation of transcription, DNA-dependent // inferred from electronic annotation /// 0007275	0005634 // nucleus // inferred from direct assay /// 0005634 // nucleus // inferred from electronic annotation	0003677 // DNA binding // inferred from electronic annotation /// 0003700 // sequence-specific DNA binding transcription factor activity // inferred from electronic annotation /// 0043565 // sequence-specific DNA binding // inferred from electronic annota	---
200800_s_at	heat shock 70kDa protein 1A /// heat shock 70kDa protein 1B	HSPA1A /// HSPA1B	1784.49	1448.8	907.121	100	3258.09	2679.2	1739	100	-0.757812	-1.69092	7.8125	75	0.0150309	1.81106e-09	3.31899e-08	1.41924e-06	17.1875	39.2857	35.7143	chr6p21.3	0006402 // mRNA catabolic process // inferred from direct assay /// 0006916 // anti-apoptosis // traceable author statement /// 0006950 // response to stress // inferred from electronic annotation /// 0006986 // response to unfolded protein // inferred fr	0005634 // nucleus // inferred from direct assay /// 0005737 // cytoplasm // inferred from direct assay /// 0005737 // cytoplasm // traceable author statement /// 0005737 // cytoplasm // inferred from electronic annotation /// 0005739 // mitochondrion //	0000166 // nucleotide binding // inferred from electronic annotation /// 0005515 // protein binding // inferred from physical interaction /// 0005524 // ATP binding // inferred from electronic annotation /// 0031625 // ubiquitin protein ligase binding //	---
213418_at	heat shock 70kDa protein 6 (HSP70B')	HSPA6	415.1	383.8	132.116	100	793.6	774.65	249.957	100	-0.854687	-1.80837	9.375	71.875	0.00318808	3.27512e-09	4.41123e-07	3.35138e-07	18.75	35.7143	32.1429	chr1q23	0006950 // response to stress // inferred from electronic annotation /// 0006986 // response to unfolded protein // traceable author statement	---	0000166 // nucleotide binding // inferred from electronic annotation /// 0005524 // ATP binding // inferred from electronic annotation	---
117_at	heat shock 70kDa protein 6 (HSP70B')	HSPA6	224.188	191.35	95.4194	100	377.162	381.05	111.632	100	-0.709375	-1.6351	6.25	67.1875	0.0143837	3.88226e-09	1.02483e-06	2.45894e-07	26.5625	35.7143	39.2857	chr1q23	0006950 // response to stress // inferred from electronic annotation /// 0006986 // response to unfolded protein // traceable author statement	---	0000166 // nucleotide binding // inferred from electronic annotation /// 0005524 // ATP binding // inferred from electronic annotation	---
202147_s_at	interferon-related developmental regulator 1	IFRD1	527.712	502	342.266	100	326.088	309.95	90.3924	100	0.578125	1.49291	62.5	14.0625	0.181447	7.49041e-05	0.00398082	2.41647e-05	23.4375	17.8571	64.2857	chr7q31.1	0007275 // multicellular organismal development // inferred from electronic annotation /// 0007518 // myoblast cell fate determination // traceable author statement /// 0007527 // adult somatic muscle development // inferred from electronic annotation ///	0005634 // nucleus // inferred from electronic annotation	0005488 // binding // inferred from electronic annotation	Hypertrophy_model // GenMAPP
209374_s_at	immunoglobulin heavy constant mu	IGHM	884.363	482.35	778.697	100	349.962	252.9	371.672	62.5	1.58437	2.99878	68.75	14.0625	0.110451	5.11576e-05	9.36132e-05	0.00219083	17.1875	10.7143	14.2857	chr14q32.33	0006955 // immune response // non-traceable author statement	0005576 // extracellular region // inferred from electronic annotation /// 0005624 // membrane fraction // non-traceable author statement /// 0005886 // plasma membrane // inferred from electronic annotation /// 0016020 // membrane // inferred from electr	0003823 // antigen binding // inferred from electronic annotation	---
207433_at	interleukin 10	IL10	226.838	224.05	108.179	100	138.875	117.85	83.0549	100	0.814063	1.75816	60.9375	9.375	0.0846068	6.80812e-06	4.33992e-05	0.00032818	29.6875	32.1429	28.5714	chr1q31-q32	0001818 // negative regulation of cytokine production // inferred from electronic annotation /// 0002237 // response to molecule of bacterial origin // inferred from direct assay /// 0002740 // negative regulation of cytokine secretion involved in immune	0005576 // extracellular region // inferred from electronic annotation /// 0005615 // extracellular space // inferred from direct assay /// 0005615 // extracellular space // inferred from electronic annotation	0005125 // cytokine activity // non-traceable author statement /// 0005125 // cytokine activity // inferred from electronic annotation /// 0005141 // interleukin-10 receptor binding // non-traceable author statement /// 0005141 // interleukin-10 receptor	---
210904_s_at	interleukin 13 receptor, alpha 1	IL13RA1	352.95	365.25	57.6159	100	216.1	194	50.735	100	0.667187	1.58797	75	0	0.000324681	1.51277e-17	3.34868e-16	1.02829e-11	25	46.4286	46.4286	chrXq24	0002639 // positive regulation of immunoglobulin production // inferred from electronic annotation /// 0007166 // cell surface receptor linked signaling pathway // traceable author statement /// 0030890 // positive regulation of B cell proliferation // in	0005886 // plasma membrane // traceable author statement /// 0005898 // interleukin-13 receptor complex // traceable author statement /// 0016020 // membrane // inferred from electronic annotation /// 0016021 // integral to membrane // inferred from elect	0004872 // receptor activity // inferred from electronic annotation /// 0004896 // cytokine receptor activity // inferred from electronic annotation /// 0005515 // protein binding // inferred from physical interaction /// 0016515 // interleukin-13 recepto	---
205403_at	interleukin 1 receptor, type II	IL1R2	2930.12	1494.75	2659.8	100	629.6	517.6	511.681	100	1.80156	3.48598	73.4375	12.5	0.0305895	6.55549e-08	3.56153e-05	2.13199e-07	14.0625	7.14286	14.2857	chr2q12	0006955 // immune response // traceable author statement	0005886 // plasma membrane // not recorded /// 0016020 // membrane // inferred from electronic annotation /// 0016021 // integral to membrane // inferred from electronic annotation	0004872 // receptor activity // inferred from electronic annotation /// 0004908 // interleukin-1 receptor activity // traceable author statement /// 0004908 // interleukin-1 receptor activity // inferred from electronic annotation /// 0004910 // interleuk	---
211372_s_at	interleukin 1 receptor, type II	IL1R2	1867.51	796	1853.12	100	341.488	308.2	227.802	100	1.96406	3.90159	73.4375	12.5	0.0269252	9.65095e-09	1.65977e-05	1.04227e-08	14.0625	7.14286	32.1429	chr2q12	0006955 // immune response // traceable author statement	0005886 // plasma membrane // not recorded /// 0016020 // membrane // inferred from electronic annotation /// 0016021 // integral to membrane // inferred from electronic annotation	0004872 // receptor activity // inferred from electronic annotation /// 0004908 // interleukin-1 receptor activity // traceable author statement /// 0004908 // interleukin-1 receptor activity // inferred from electronic annotation /// 0004910 // interleuk	---
211506_s_at	interleukin 8	IL8	1466.89	1156.7	960.455	100	768.7	747.15	333.056	100	0.696875	1.62099	65.625	18.75	0.0774007	0.000138769	0.00240979	0.000544718	15.625	25	21.4286	chr4q13-q21	0001525 // angiogenesis // traceable author statement /// 0006928 // cellular component movement // traceable author statement /// 0006935 // chemotaxis // inferred from electronic annotation /// 0006954 // inflammatory response // traceable author statem	0005576 // extracellular region // not recorded /// 0005576 // extracellular region // inferred from electronic annotation /// 0005615 // extracellular space // inferred from electronic annotation /// 0005615 // extracellular space // traceable author sta	0005125 // cytokine activity // inferred from electronic annotation /// 0005153 // interleukin-8 receptor binding // inferred from physical interaction /// 0005515 // protein binding // inferred from physical interaction /// 0008009 // chemokine activity	---
205884_at	integrin, alpha 4 (antigen CD49D, alpha 4 subunit of VLA-4 receptor)	ITGA4	205.15	205.45	81.9093	100	96.95	87.85	31.8295	100	0.875	1.83401	70.3125	4.6875	0.00255068	1.56158e-10	2.81526e-07	7.54907e-09	25	21.4286	57.1429	chr2q31.3	0001974 // blood vessel remodeling // inferred from electronic annotation /// 0007155 // cell adhesion // inferred from electronic annotation /// 0007157 // heterophilic cell-cell adhesion // inferred from electronic annotation /// 0007159 // leukocyte ce	0005886 // plasma membrane // not recorded /// 0008305 // integrin complex // inferred from electronic annotation /// 0009897 // external side of plasma membrane // inferred from electronic annotation /// 0009986 // cell surface // inferred from direct as	0001968 // fibronectin binding // inferred from electronic annotation /// 0004872 // receptor activity // inferred from electronic annotation /// 0005515 // protein binding // inferred from physical interaction /// 0042802 // identical protein binding //	Integrin-mediated_cell_adhesion_KEGG // GenMAPP
201656_at	integrin, alpha 6	ITGA6	115.25	119.6	34.6576	100	56.55	46.2	38.5829	75	1.37031	2.58527	60.9375	1.5625	0.0309205	6.14375e-10	2.28729e-11	8.78695e-06	37.5	67.8571	35.7143	chr2q31.1	0007044 // cell-substrate junction assembly // traceable author statement /// 0007155 // cell adhesion // inferred from electronic annotation /// 0007160 // cell-matrix adhesion // inferred from electronic annotation /// 0007229 // integrin-mediated signa	0005604 // basement membrane // inferred from electronic annotation /// 0005886 // plasma membrane // not recorded /// 0005886 // plasma membrane // inferred from electronic annotation /// 0005913 // cell-cell adherens junction // inferred from electronic	0004872 // receptor activity // inferred from electronic annotation /// 0005178 // integrin binding // inferred from electronic annotation /// 0005515 // protein binding // inferred from physical interaction /// 0005515 // protein binding // inferred from	Integrin-mediated_cell_adhesion_KEGG // GenMAPP
1553678_a_at	integrin, beta 1 (fibronectin receptor, beta polypeptide, antigen CD29 includes MDF2, MSK12)	ITGB1	740.175	733.75	89.0058	100	591.388	579.25	108.506	100	0.389063	1.30954	68.75	3.125	0.0131395	3.83557e-12	3.85312e-11	4.70923e-08	28.125	67.8571	57.1429	chr10p11.2	0000082 // G1/S transition of mitotic cell cycle // inferred from electronic annotation /// 0001701 // in utero embryonic development // inferred from electronic annotation /// 0001708 // cell fate specification // inferred from electronic annotation ///	0001669 // acrosomal vesicle // inferred from electronic annotation /// 0001726 // ruffle // traceable author statement /// 0005604 // basement membrane // inferred from electronic annotation /// 0005624 // membrane fraction // inferred from electronic an	0004872 // receptor activity // inferred from electronic annotation /// 0005178 // integrin binding // inferred from electronic annotation /// 0005488 // binding // inferred from electronic annotation /// 0005515 // protein binding // inferred from physic	Integrin-mediated_cell_adhesion_KEGG // GenMAPP
206765_at	potassium inwardly-rectifying channel, subfamily J, member 2	KCNJ2	343.425	276.65	183.146	100	720.25	680.05	138.198	100	-1.14375	-2.20955	6.25	75	0.00374942	1.18156e-12	1.86946e-07	1.76748e-13	18.75	14.2857	39.2857	chr17q24.3	0006810 // transport // inferred from electronic annotation /// 0006811 // ion transport // inferred from electronic annotation /// 0006813 // potassium ion transport // inferred from electronic annotation /// 0006813 // potassium ion transport // traceab	0005887 // integral to plasma membrane // traceable author statement /// 0016020 // membrane // inferred from electronic annotation /// 0016021 // integral to membrane // inferred from electronic annotation /// 0030425 // dendrite // inferred from electro	0005216 // ion channel activity // inferred from electronic annotation /// 0005242 // inward rectifier potassium channel activity // inferred from electronic annotation /// 0005242 // inward rectifier potassium channel activity // traceable author stateme	---
1561206_at	kelch-like 8 (Drosophila)	KLHL8	85.175	75.15	45.4779	100	163.713	189.3	95.3473	100	-0.770313	-1.70564	17.1875	62.5	0.292568	0.00722136	0.0120949	0.0349837	20.3125	25	32.1429	chr4q22.1	---	---	0005515 // protein binding // inferred from electronic annotation	---
1555643_s_at	leukocyte immunoglobulin-like receptor, subfamily A (with TM domain), member 5	LILRA5	1428.85	1434.5	362.223	100	1030.4	981.45	181.22	100	0.401563	1.32094	62.5	4.6875	0.0247262	3.84464e-07	8.67784e-05	1.34377e-06	32.8125	25	50	chr19q13.4	0045087 // innate immune response // inferred from electronic annotation	0005576 // extracellular region // inferred from electronic annotation /// 0016020 // membrane // inferred from electronic annotation /// 0016021 // integral to membrane // inferred from electronic annotation	0004872 // receptor activity // inferred from electronic annotation	---
232623_at	INM04	LOC100128751	22.3625	7.65	26.5047	12.5	107.125	122.1	72.5994	50	-1.83594	-3.57003	15.625	60.9375	0.0484007	5.50507e-06	2.36113e-05	0.000359608	23.4375	67.8571	32.1429	chr1q24.2	---	---	---	---
230292_at	Similar to hCG2020760	LOC100131993	426.475	397.05	253.208	100	778.188	770.9	445.153	100	-0.754687	-1.68727	20.3125	64.0625	0.245007	0.00240977	0.00466763	0.018145	15.625	17.8571	14.2857	chr13q14.2	---	---	---	---
211996_s_at	similar to Uncharacterized protein KIAA0220 /// hypothetical protein 348162 /// nuclear pore complex interacting protein pseudogene /// nuclear pore complex-interacting protein-like 3-like /// nuclear pore complex interacting protein-like 3	LOC100132247 /// LOC348162 /// LOC613037 /// LOC728888 /// NPIPL3	2044.53	2222.5	887.963	100	3098.64	3255.35	1370.14	100	-0.528125	-1.44205	15.625	60.9375	0.202143	0.0015908	0.0050949	0.0107755	23.4375	32.1429	25	chr16p11.2 /// chr16p12.2	---	0016020 // membrane // inferred from electronic annotation /// 0016021 // integral to membrane // inferred from electronic annotation	---	---
227384_s_at	hypothetical protein LOC727820	LOC727820	393.487	418.95	215.421	100	769.238	957.65	416.362	100	-0.684375	-1.60701	18.75	68.75	0.297126	0.0112032	0.0202877	0.044699	12.5	28.5714	39.2857	chr1q21.1	---	---	---	---
227383_at	hypothetical protein LOC727820	LOC727820	300.337	353.95	152.659	100	498.587	634.9	244.02	100	-0.589062	-1.50427	18.75	62.5	0.308342	0.0185223	0.030742	0.0624928	18.75	21.4286	39.2857	chr1q21.1	---	---	---	---
1562511_at	lysosomal trafficking regulator	LYST	73.2	68.1	25.823	87.5	183.238	211.05	94.6703	100	-0.992187	-1.9892	7.8125	73.4375	0.0869931	8.80711e-08	1.04967e-07	4.61943e-05	18.75	78.5714	32.1429	chr1q42.1-q42.2	0006810 // transport // inferred from electronic annotation /// 0015031 // protein transport // inferred from electronic annotation /// 0030595 // leukocyte chemotaxis // inferred from sequence or structural similarity /// 0032438 // melanosome organizati	0005737 // cytoplasm // inferred from electronic annotation /// 0015630 // microtubule cytoskeleton // inferred from direct assay	0005515 // protein binding // inferred from physical interaction	---
201670_s_at	myristoylated alanine-rich protein kinase C substrate	MARCKS	778.263	703.4	236.369	100	1179.22	1133.8	314.965	100	-0.585938	-1.50101	6.25	70.3125	0.0115072	2.59318e-09	5.30962e-07	2.52881e-07	23.4375	25	32.1429	chr6q22.2	---	0005737 // cytoplasm // inferred from electronic annotation /// 0005813 // centrosome // inferred from electronic annotation /// 0005856 // cytoskeleton // inferred from electronic annotation /// 0005938 // cell cortex // inferred from electronic annotati	0003779 // actin binding // inferred from electronic annotation /// 0005080 // protein kinase C binding // inferred from electronic annotation /// 0005516 // calmodulin binding // inferred from electronic annotation /// 0005516 // calmodulin binding // tr	---
225897_at	myristoylated alanine-rich protein kinase C substrate	MARCKS	431.725	365.65	175.17	100	628.225	622.5	173.582	100	-0.553125	-1.46726	14.0625	60.9375	0.0453881	7.9953e-06	0.000202888	0.000106261	25	42.8571	35.7143	chr6q22.2	---	0005737 // cytoplasm // inferred from electronic annotation /// 0005813 // centrosome // inferred from electronic annotation /// 0005856 // cytoskeleton // inferred from electronic annotation /// 0005938 // cell cortex // inferred from electronic annotati	0003779 // actin binding // inferred from electronic annotation /// 0005080 // protein kinase C binding // inferred from electronic annotation /// 0005516 // calmodulin binding // inferred from electronic annotation /// 0005516 // calmodulin binding // tr	---
224917_at	microRNA 21	MIR21	1262.13	1330.95	509.878	100	1783.34	1622.4	790.333	100	-0.559375	-1.47363	20.3125	62.5	0.227982	0.00128728	0.00706528	0.00574325	17.1875	10.7143	17.8571	chr17q23.1	---	---	---	---
221381_s_at	mortality factor 4 /// mortality factor 4 like 1	MORF4 /// MORF4L1	1671.21	1463.85	343.328	100	1409.59	1215.65	397.91	100	0.404688	1.3238	65.625	0	0.156715	3.82647e-12	2.22989e-09	9.72522e-09	34.375	67.8571	50	chr15q24 /// chr4q34.1	0000724 // double-strand break repair via homologous recombination // inferred from direct assay /// 0006281 // DNA repair // inferred from electronic annotation /// 0006333 // chromatin assembly or disassembly // inferred from electronic annotation /// 0	0000785 // chromatin // inferred from electronic annotation /// 0005634 // nucleus // inferred from electronic annotation /// 0016580 // Sin3 complex // inferred from direct assay /// 0035267 // NuA4 histone acetyltransferase complex // inferred from dire	0003682 // chromatin binding // inferred from electronic annotation /// 0005515 // protein binding // inferred from physical interaction /// 0047485 // protein N-terminus binding // inferred from physical interaction	---
218027_at	mitochondrial ribosomal protein L15	MRPL15	819.15	855.75	122.115	100	646.275	652.2	54.3876	100	0.3625	1.28565	62.5	1.5625	0.0053423	1.31623e-11	1.42433e-07	8.5324e-11	35.9375	53.5714	67.8571	chr8q11.2-q13	0006412 // translation // inferred from electronic annotation	0005739 // mitochondrion // inferred from direct assay /// 0005739 // mitochondrion // inferred from electronic annotation /// 0005840 // ribosome // inferred from electronic annotation /// 0015934 // large ribosomal subunit // inferred from electronic an	0003735 // structural constituent of ribosome // inferred from electronic annotation	---
219607_s_at	membrane-spanning 4-domains, subfamily A, member 4	MS4A4A	2366.94	2382.6	744.02	100	1525.61	1616.4	554.441	100	0.709375	1.6351	68.75	12.5	0.0421894	1.01015e-07	1.13962e-06	2.18826e-05	18.75	25	21.4286	chr11q12	---	0016020 // membrane // inferred from electronic annotation /// 0016021 // integral to membrane // inferred from electronic annotation	0004872 // receptor activity // inferred from electronic annotation	---
1555728_a_at	membrane-spanning 4-domains, subfamily A, member 4	MS4A4A	1628.79	1672	606.276	100	961.575	1088.15	359.026	100	0.8	1.7411	65.625	7.8125	0.0356511	9.76438e-08	1.69543e-06	1.47553e-05	26.5625	25	25	chr11q12	---	0016020 // membrane // inferred from electronic annotation /// 0016021 // integral to membrane // inferred from electronic annotation	0004872 // receptor activity // inferred from electronic annotation	---
221899_at	NEDD4 binding protein 2-like 2	N4BP2L2	904.825	923.45	339.798	100	1357.95	1613.35	552.413	100	-0.459375	-1.37495	20.3125	65.625	0.24609	0.0170131	0.0229508	0.0661007	14.0625	17.8571	35.7143	chr13q13.1	0001906 // cell killing // inferred from electronic annotation	---	0005515 // protein binding // inferred from physical interaction /// 0005524 // ATP binding // inferred from electronic annotation	---
1555167_s_at	nicotinamide phosphoribosyltransferase	NAMPT	281.613	233.3	158.132	100	156.125	148.6	73.3143	100	0.828125	1.77538	62.5	12.5	0.0914872	6.40967e-05	0.00135668	0.000273669	25	17.8571	32.1429	chr7q22.3	0006769 // nicotinamide metabolic process // not recorded /// 0007165 // signal transduction // traceable author statement /// 0007267 // cell-cell signaling // traceable author statement /// 0008284 // positive regulation of cell proliferation // traceab	0005737 // cytoplasm // inferred from electronic annotation /// 0005829 // cytosol // not recorded	0004514 // nicotinate-nucleotide diphosphorylase (carboxylating) activity // inferred from electronic annotation /// 0004516 // nicotinate phosphoribosyltransferase activity // inferred from electronic annotation /// 0005125 // cytokine activity // tracea	---
214693_x_at	neuroblastoma breakpoint family, member 10	NBPF10	1857.1	1986.2	535.858	100	3199.4	3317.65	682.382	100	-0.509375	-1.42343	0	65.625	0.00214733	5.96874e-11	5.69098e-08	5.54733e-09	34.375	53.5714	60.7143	chr1q21.1	0007219 // Notch signaling pathway // inferred from electronic annotation /// 0007275 // multicellular organismal development // inferred from electronic annotation /// 0030154 // cell differentiation // inferred from electronic annotation	0005576 // extracellular region // inferred from electronic annotation /// 0005737 // cytoplasm // inferred from electronic annotation	0005509 // calcium ion binding // inferred from electronic annotation	---
214722_at	notch 2 N-terminal like	NOTCH2NL	1617.3	1440.25	895.25	100	2887.81	2936.1	1463.14	100	-0.782813	-1.72048	15.625	70.3125	0.127415	0.000196361	0.000975634	0.0024413	14.0625	14.2857	25	chr1q21.2	0007219 // Notch signaling pathway // inferred from electronic annotation /// 0007275 // multicellular organismal development // inferred from electronic annotation /// 0030154 // cell differentiation // inferred from electronic annotation	0005576 // extracellular region // inferred from electronic annotation /// 0005737 // cytoplasm // inferred from electronic annotation	0005509 // calcium ion binding // inferred from electronic annotation	---
227067_x_at	notch 2 N-terminal like	NOTCH2NL	598.613	604.8	131.313	100	818.313	755.6	204.864	100	-0.465625	-1.38092	1.5625	60.9375	0.0246721	5.86892e-10	4.11715e-08	4.08678e-07	37.5	42.8571	42.8571	chr1q21.2	0001709 // cell fate determination // inferred from electronic annotation /// 0001709 // cell fate determination // traceable author statement /// 0002011 // morphogenesis of an epithelial sheet // inferred from electronic annotation /// 0006350 // transc	0005576 // extracellular region // inferred from electronic annotation /// 0005634 // nucleus // inferred from direct assay /// 0005634 // nucleus // inferred from electronic annotation /// 0005737 // cytoplasm // inferred from electronic annotation /// 0	0003706 // ligand-regulated transcription factor activity // traceable author statement /// 0004872 // receptor activity // inferred from electronic annotation /// 0004872 // receptor activity // non-traceable author statement /// 0005509 // calcium ion b	---
225768_at	nuclear receptor subfamily 1, group D, member 2	NR1D2	361.775	309.85	166.385	100	153.313	129.75	73.3437	100	1.20469	2.30487	78.125	3.125	0.00236323	2.4026e-14	1.09031e-10	2.66527e-11	18.75	35.7143	57.1429	chr3p24.2	0006350 // transcription // inferred from electronic annotation /// 0006355 // regulation of transcription, DNA-dependent // traceable author statement /// 0006355 // regulation of transcription, DNA-dependent // inferred from electronic annotation /// 00	0005634 // nucleus // traceable author statement /// 0005634 // nucleus // inferred from electronic annotation	0003677 // DNA binding // inferred from electronic annotation /// 0003700 // sequence-specific DNA binding transcription factor activity // inferred from electronic annotation /// 0003707 // steroid hormone receptor activity // inferred from electronic an	Circadian_Exercise // GenMAPP /// Nuclear_Receptors // GenMAPP
209750_at	nuclear receptor subfamily 1, group D, member 2	NR1D2	150.175	118.95	89.6486	100	72.3375	71.25	37.9142	75	1.07031	2.09989	67.1875	3.125	0.0147099	4.08131e-10	3.18109e-08	4.97067e-07	29.6875	46.4286	32.1429	chr3p24.2	0006350 // transcription // inferred from electronic annotation /// 0006355 // regulation of transcription, DNA-dependent // traceable author statement /// 0006355 // regulation of transcription, DNA-dependent // inferred from electronic annotation /// 00	0005634 // nucleus // traceable author statement /// 0005634 // nucleus // inferred from electronic annotation	0003677 // DNA binding // inferred from electronic annotation /// 0003700 // sequence-specific DNA binding transcription factor activity // inferred from electronic annotation /// 0003707 // steroid hormone receptor activity // inferred from electronic an	Circadian_Exercise // GenMAPP /// Nuclear_Receptors // GenMAPP
215207_x_at	nuclear undecaprenyl pyrophosphate synthase 1 homolog (S. cerevisiae) /// nuclear undecaprenyl pyrophosphate synthase 1 homolog (S. cerevisiae) pseudogene 3	NUS1 /// NUS1P3	135.262	121.05	36.1301	100	73.8625	67.8	28.1009	100	0.626563	1.54388	68.75	0	0.00171174	3.04572e-21	2.79456e-20	2.12442e-13	31.25	96.4286	75	chr13q12 /// chr6q22.1	0001525 // angiogenesis // inferred from electronic annotation /// 0007275 // multicellular organismal development // inferred from electronic annotation /// 0030154 // cell differentiation // inferred from electronic annotation	0016020 // membrane // inferred from electronic annotation /// 0016021 // integral to membrane // inferred from electronic annotation	0004872 // receptor activity // inferred from electronic annotation /// 0016765 // transferase activity, transferring alkyl or aryl (other than methyl) groups // inferred from electronic annotation	---
230170_at	oncostatin M	OSM	446.912	362.65	238.03	100	263.75	229.15	122.857	100	0.790625	1.72982	62.5	6.25	0.0566891	6.19922e-07	1.95786e-05	2.38309e-05	31.25	25	32.1429	chr22q12.2	0002675 // positive regulation of acute inflammatory response // inferred by curator /// 0006915 // apoptosis // inferred from electronic annotation /// 0006955 // immune response // inferred from electronic annotation /// 0007275 // multicellular organis	0005576 // extracellular region // inferred from electronic annotation /// 0005615 // extracellular space // inferred from electronic annotation /// 0005615 // extracellular space // traceable author statement /// 0005900 // oncostatin-M receptor complex	0005125 // cytokine activity // inferred from direct assay /// 0005125 // cytokine activity // inferred from electronic annotation /// 0005125 // cytokine activity // traceable author statement /// 0005147 // oncostatin-M receptor binding // inferred from	---
201118_at	phosphogluconate dehydrogenase	PGD	2757.39	2898.6	397.78	100	1999.85	1850.1	417.857	100	0.423438	1.34112	67.1875	4.6875	0.00327269	1.15357e-11	3.2632e-09	1.71742e-08	28.125	50	46.4286	chr1p36.22	0006098 // pentose-phosphate shunt // inferred from sequence or structural similarity /// 0006098 // pentose-phosphate shunt // inferred from electronic annotation /// 0008152 // metabolic process // inferred from electronic annotation /// 0009051 // pent	0005737 // cytoplasm // inferred from electronic annotation	0003824 // catalytic activity // inferred from electronic annotation /// 0004616 // phosphogluconate dehydrogenase (decarboxylating) activity // inferred from sequence or structural similarity /// 0004616 // phosphogluconate dehydrogenase (decarboxylating	Pentose_Phosphate_Pathway // GenMAPP
215236_s_at	phosphatidylinositol binding clathrin assembly protein	PICALM	160.5	176.75	34.1618	100	118.488	113.4	38.692	100	0.535937	1.44988	65.625	3.125	0.0481271	7.27797e-09	4.88773e-07	1.7968e-06	31.25	53.5714	53.5714	chr11q14	0006461 // protein complex assembly // traceable author statement /// 0006897 // endocytosis // inferred from electronic annotation /// 0006898 // receptor-mediated endocytosis // inferred from direct assay /// 0006898 // receptor-mediated endocytosis //	0005622 // intracellular // inferred from electronic annotation /// 0005634 // nucleus // inferred from direct assay /// 0005794 // Golgi apparatus // inferred from electronic annotation /// 0005886 // plasma membrane // inferred from direct assay /// 000	0005515 // protein binding // inferred from physical interaction /// 0005543 // phospholipid binding // inferred from electronic annotation /// 0005545 // phosphatidylinositol binding // inferred from sequence or structural similarity /// 0005545 // phosp	---
201929_s_at	plakophilin 4	PKP4	147.838	153.1	31.5039	100	95.5125	97.2	16.0878	100	0.66875	1.5897	71.875	0	0.00134904	6.92442e-19	1.14566e-12	1.06439e-16	28.125	64.2857	92.8571	chr2q24.1	0007155 // cell adhesion // inferred from electronic annotation /// 0007155 // cell adhesion // non-traceable author statement	0005911 // cell-cell junction // traceable author statement /// 0030054 // cell junction // inferred from electronic annotation /// 0030057 // desmosome // inferred from electronic annotation	0005488 // binding // inferred from electronic annotation /// 0005515 // protein binding // inferred from physical interaction	---
201928_at	plakophilin 4	PKP4	267.1	262.7	50.5823	100	207.838	204.3	26.7291	100	0.539062	1.45303	60.9375	0	0.0138592	5.31341e-12	5.06936e-08	1.05033e-10	39.0625	53.5714	89.2857	chr2q24.1	0007155 // cell adhesion // inferred from electronic annotation /// 0007155 // cell adhesion // non-traceable author statement	0005911 // cell-cell junction // traceable author statement /// 0030054 // cell junction // inferred from electronic annotation /// 0030057 // desmosome // inferred from electronic annotation	0005488 // binding // inferred from electronic annotation /// 0005515 // protein binding // inferred from physical interaction	---
201939_at	polo-like kinase 2	PLK2	512.425	468.45	349.487	100	265.7	188.9	165.047	100	0.728125	1.65648	60.9375	26.5625	0.225882	0.00299895	0.0215425	0.0053681	12.5	7.14286	32.1429	chr5q12.1-q13.2	0000278 // mitotic cell cycle // inferred from electronic annotation /// 0006468 // protein phosphorylation // inferred from electronic annotation /// 0043123 // positive regulation of I-kappaB kinase/NF-kappaB cascade // inferred from mutant phenotype	---	0000166 // nucleotide binding // inferred from electronic annotation /// 0004672 // protein kinase activity // inferred from electronic annotation /// 0004674 // protein serine/threonine kinase activity // inferred from electronic annotation /// 0004871 /	---
236492_at	protein phosphatase 2, regulatory subunit B, alpha	PPP2R2A	121.213	126.75	37.8512	100	178.313	195.95	76.9024	100	-0.507812	-1.42189	14.0625	60.9375	0.243665	0.00250052	0.00323008	0.0215068	25	60.7143	50	chr8p21.2	0006470 // protein dephosphorylation // inferred from direct assay /// 0007165 // signal transduction // inferred from electronic annotation /// 0043278 // response to morphine // inferred from electronic annotation	0000159 // protein phosphatase type 2A complex // inferred from direct assay /// 0000159 // protein phosphatase type 2A complex // inferred from electronic annotation	0004722 // protein serine/threonine phosphatase activity // inferred from direct assay /// 0005515 // protein binding // inferred from physical interaction /// 0008601 // protein phosphatase type 2A regulator activity // traceable author statement /// 000	Glycogen_Metabolism // GenMAPP
207791_s_at	RAB1A, member RAS oncogene family	RAB1A	815.1	807.8	98.4081	100	590.063	558.8	66.3114	100	0.420313	1.33822	70.3125	0	0.000112367	1.52647e-16	1.00545e-11	1.54419e-14	29.6875	64.2857	60.7143	chr2p14	0006810 // transport // inferred from electronic annotation /// 0007264 // small GTPase mediated signal transduction // inferred from electronic annotation /// 0015031 // protein transport // inferred from electronic annotation /// 0016192 // vesicle-medi	0005625 // soluble fraction // inferred from electronic annotation /// 0005626 // insoluble fraction // inferred from electronic annotation /// 0005783 // endoplasmic reticulum // inferred from electronic annotation /// 0005794 // Golgi apparatus // infer	0000166 // nucleotide binding // inferred from electronic annotation /// 0003924 // GTPase activity // traceable author statement /// 0005525 // GTP binding // inferred from electronic annotation	---
222846_at	RAB8B, member RAS oncogene family	RAB8B	335.9	335.95	76.8393	100	226.637	197.7	74.9323	100	0.609375	1.5256	64.0625	7.8125	0.0139864	5.85503e-09	1.1479e-07	3.54043e-06	28.125	53.5714	46.4286	chr15q22.2	0006810 // transport // inferred from electronic annotation /// 0007264 // small GTPase mediated signal transduction // inferred from electronic annotation /// 0015031 // protein transport // non-traceable author statement /// 0015031 // protein transport	0005625 // soluble fraction // inferred from electronic annotation /// 0005626 // insoluble fraction // inferred from electronic annotation /// 0005739 // mitochondrion // inferred from electronic annotation /// 0005886 // plasma membrane // inferred from	0000166 // nucleotide binding // inferred from electronic annotation /// 0003924 // GTPase activity // non-traceable author statement /// 0005515 // protein binding // inferred from physical interaction /// 0005515 // protein binding // inferred from elec	---
1555814_a_at	ras homolog gene family, member A	RHOA	2168.5	2104.6	321.695	100	1374.7	1384.3	345.736	100	0.623437	1.54054	76.5625	1.5625	0.00189759	8.0706e-18	2.36155e-16	1.32697e-11	21.875	46.4286	39.2857	chr3p21.3	0000902 // cell morphogenesis // inferred from electronic annotation /// 0001666 // response to hypoxia // inferred from electronic annotation /// 0006357 // regulation of transcription from RNA polymerase II promoter // inferred from electronic annotatio	0005622 // intracellular // inferred from electronic annotation /// 0005624 // membrane fraction // inferred from electronic annotation /// 0005625 // soluble fraction // inferred from electronic annotation /// 0005634 // nucleus // inferred from electron	0000166 // nucleotide binding // inferred from electronic annotation /// 0003924 // GTPase activity // traceable author statement /// 0003924 // GTPase activity // inferred from electronic annotation /// 0005515 // protein binding // inferred from physica	G13_Signaling_Pathway // GenMAPP /// G_Protein_Signaling // GenMAPP /// Wnt_signaling // GenMAPP
223341_s_at	short coiled-coil protein	SCOC	122.3	123.4	45.9873	100	57.5125	51.75	28.3907	100	0.879687	1.83998	62.5	3.125	0.00287631	3.44387e-14	5.1992e-11	7.16855e-11	34.375	42.8571	64.2857	chr4q31.1	---	0005634 // nucleus // inferred from electronic annotation /// 0005794 // Golgi apparatus // inferred from electronic annotation	0005515 // protein binding // inferred from physical interaction	---
243969_at	solute carrier family 24 (sodium/potassium/calcium exchanger), member 4	SLC24A4	317.662	327.35	91.6754	100	526.538	550.05	127.577	100	-0.745312	-1.67634	1.5625	73.4375	0.00458602	1.16981e-13	7.8906e-09	1.46552e-12	25	39.2857	57.1429	chr14q32.12	0006810 // transport // inferred from electronic annotation /// 0006811 // ion transport // inferred from electronic annotation /// 0006813 // potassium ion transport // inferred from electronic annotation /// 0006814 // sodium ion transport // inferred f	0016020 // membrane // inferred from electronic annotation /// 0016021 // integral to membrane // inferred from electronic annotation	0015293 // symporter activity // inferred from electronic annotation /// 0015297 // antiporter activity // inferred from electronic annotation	---
1568870_at	solute carrier family 24 (sodium/potassium/calcium exchanger), member 4	SLC24A4	582.975	558.7	195.701	100	883.387	888.1	187.572	100	-0.6875	-1.61049	6.25	67.1875	0.0160368	1.46267e-08	1.30632e-05	8.16754e-08	26.5625	32.1429	39.2857	chr14q32.12	0006810 // transport // inferred from electronic annotation /// 0006811 // ion transport // inferred from electronic annotation /// 0006813 // potassium ion transport // inferred from electronic annotation /// 0006814 // sodium ion transport // inferred f	0016020 // membrane // inferred from electronic annotation /// 0016021 // integral to membrane // inferred from electronic annotation	0015293 // symporter activity // inferred from electronic annotation /// 0015297 // antiporter activity // inferred from electronic annotation	---
213164_at	solute carrier family 5 (sodium/myo-inositol cotransporter), member 3	SLC5A3	208.138	233.75	61.2969	100	334.225	328.7	78.7783	100	-0.59375	-1.50916	3.125	62.5	0.007736	1.56215e-09	2.01924e-07	3.89236e-07	34.375	46.4286	46.4286	chr21q22.12	0006020 // inositol metabolic process // inferred from electronic annotation /// 0006810 // transport // traceable author statement /// 0006810 // transport // inferred from electronic annotation /// 0006811 // ion transport // inferred from electronic an	0005886 // plasma membrane // not recorded /// 0005887 // integral to plasma membrane // traceable author statement /// 0016020 // membrane // inferred from electronic annotation /// 0016021 // integral to membrane // traceable author statement /// 001602	0005215 // transporter activity // inferred from electronic annotation /// 0005367 // myo-inositol:sodium symporter activity // not recorded /// 0005367 // myo-inositol:sodium symporter activity // traceable author statement /// 0015293 // symporter activ	---
206359_at	suppressor of cytokine signaling 3	SOCS3	272.288	278.2	81.5316	100	152.113	142.5	56.4149	100	0.6375	1.55563	60.9375	0	0.0094959	1.49743e-13	2.43571e-10	4.41578e-10	39.0625	57.1429	92.8571	chr17q25.3	0001666 // response to hypoxia // inferred from electronic annotation /// 0001932 // regulation of protein phosphorylation // inferred from electronic annotation /// 0006916 // anti-apoptosis // traceable author statement /// 0007165 // signal transductio	0005737 // cytoplasm // inferred from electronic annotation	0004860 // protein kinase inhibitor activity // traceable author statement /// 0005515 // protein binding // inferred from electronic annotation	---
208800_at	signal recognition particle 72kDa	SRP72	622.025	623.85	100.729	100	435.063	380.9	113.164	100	0.540625	1.4546	71.875	6.25	0.00370235	2.06131e-12	6.27545e-10	9.42112e-09	21.875	53.5714	53.5714	chr4q11	0006468 // protein phosphorylation // traceable author statement /// 0006614 // SRP-dependent cotranslational protein targeting to membrane // inferred from electronic annotation /// 0007165 // signal transduction // traceable author statement /// 0042493	0005730 // nucleolus // inferred from direct assay /// 0005737 // cytoplasm // inferred from electronic annotation /// 0005786 // signal recognition particle, endoplasmic reticulum targeting // inferred from direct assay /// 0005786 // signal recognition	0004871 // signal transducer activity // non-traceable author statement /// 0005047 // signal recognition particle binding // inferred from physical interaction /// 0005488 // binding // inferred from electronic annotation /// 0008312 // 7S RNA binding //	---
208802_at	signal recognition particle 72kDa	SRP72	558.65	543.05	91.2925	100	447.512	433.55	97.2493	100	0.440625	1.35719	62.5	4.6875	0.0395211	9.41977e-11	3.03033e-09	2.65197e-07	32.8125	53.5714	50	chr4q11	0006468 // protein phosphorylation // traceable author statement /// 0006614 // SRP-dependent cotranslational protein targeting to membrane // inferred from electronic annotation /// 0007165 // signal transduction // traceable author statement /// 0042493	0005730 // nucleolus // inferred from direct assay /// 0005737 // cytoplasm // inferred from electronic annotation /// 0005786 // signal recognition particle, endoplasmic reticulum targeting // inferred from direct assay /// 0005786 // signal recognition	0004871 // signal transducer activity // non-traceable author statement /// 0005047 // signal recognition particle binding // inferred from physical interaction /// 0005488 // binding // inferred from electronic annotation /// 0008312 // 7S RNA binding //	---
208801_at	signal recognition particle 72kDa	SRP72	1783.29	1845.85	205.79	100	1352.68	1262.75	221.548	100	0.392187	1.31238	68.75	3.125	0.00197811	2.29713e-15	1.43149e-12	5.71903e-11	28.125	64.2857	53.5714	chr4q11	0006468 // protein phosphorylation // traceable author statement /// 0006614 // SRP-dependent cotranslational protein targeting to membrane // inferred from electronic annotation /// 0007165 // signal transduction // traceable author statement /// 0042493	0005730 // nucleolus // inferred from direct assay /// 0005737 // cytoplasm // inferred from electronic annotation /// 0005786 // signal recognition particle, endoplasmic reticulum targeting // inferred from direct assay /// 0005786 // signal recognition	0004871 // signal transducer activity // non-traceable author statement /// 0005047 // signal recognition particle binding // inferred from physical interaction /// 0005488 // binding // inferred from electronic annotation /// 0008312 // 7S RNA binding //	---
213649_at	serine/arginine-rich splicing factor 7	SRSF7	1168.21	1164.95	267.693	100	1586.36	1703.15	511.52	100	-0.421875	-1.33967	18.75	62.5	0.148322	0.000417927	0.000541122	0.00715813	18.75	39.2857	35.7143	chr2p22.1	0006397 // mRNA processing // inferred from electronic annotation /// 0006397 // mRNA processing // traceable author statement /// 0008380 // RNA splicing // not recorded /// 0008380 // RNA splicing // inferred from direct assay /// 0008380 // RNA splicin	0005634 // nucleus // inferred from electronic annotation /// 0005634 // nucleus // traceable author statement	0000166 // nucleotide binding // inferred from electronic annotation /// 0003676 // nucleic acid binding // inferred from electronic annotation /// 0003723 // RNA binding // inferred from electronic annotation /// 0005515 // protein binding // inferred fr	mRNA_processing_Reactome // GenMAPP
201061_s_at	stomatin	STOM	1268.31	1227.55	442.834	100	911.588	871.45	204.222	100	0.484375	1.39898	60.9375	9.375	0.0675946	7.75788e-07	0.000100159	4.02244e-06	29.6875	25	39.2857	chr9q34.1	0051260 // protein homooligomerization // inferred from direct assay	0005856 // cytoskeleton // inferred from direct assay /// 0005886 // plasma membrane // inferred from electronic annotation /// 0005887 // integral to plasma membrane // inferred from direct assay /// 0016020 // membrane // inferred from electronic annota	0005515 // protein binding // inferred from physical interaction /// 0005515 // protein binding // inferred from electronic annotation	---
203887_s_at	thrombomodulin	THBD	472.462	447.25	163.755	100	375.375	310	213.701	100	0.515625	1.42961	62.5	18.75	0.219962	0.000894063	0.000790192	0.0136462	18.75	39.2857	25	chr20p11.2	0007565 // female pregnancy // inferred from electronic annotation /// 0007596 // blood coagulation // traceable author statement /// 0007596 // blood coagulation // inferred from electronic annotation /// 0009790 // embryo development // inferred from el	0005615 // extracellular space // inferred from electronic annotation /// 0005886 // plasma membrane // not recorded /// 0005886 // plasma membrane // inferred from electronic annotation /// 0005887 // integral to plasma membrane // traceable author state	0004872 // receptor activity // traceable author statement /// 0004872 // receptor activity // inferred from electronic annotation /// 0004888 // transmembrane receptor activity // inferred from electronic annotation /// 0005488 // binding // inferred fro	---
203888_at	thrombomodulin	THBD	202.2	204.35	58.6071	100	163.262	115.6	106.896	100	0.539063	1.45303	60.9375	15.625	0.181563	0.000280184	0.000228349	0.00677826	23.4375	46.4286	32.1429	chr20p11.2	0007565 // female pregnancy // inferred from electronic annotation /// 0007596 // blood coagulation // traceable author statement /// 0007596 // blood coagulation // inferred from electronic annotation /// 0009790 // embryo development // inferred from el	0005615 // extracellular space // inferred from electronic annotation /// 0005886 // plasma membrane // not recorded /// 0005886 // plasma membrane // inferred from electronic annotation /// 0005887 // integral to plasma membrane // traceable author state	0004872 // receptor activity // traceable author statement /// 0004872 // receptor activity // inferred from electronic annotation /// 0004888 // transmembrane receptor activity // inferred from electronic annotation /// 0005488 // binding // inferred fro	---
204427_s_at	transmembrane emp24 domain trafficking protein 2	TMED2	369.575	405.6	71.0244	100	184	160.4	92.7407	100	1.0875	2.12505	87.5	4.6875	0.000813356	7.7603e-20	6.35345e-19	1.58933e-12	7.8125	50	53.5714	chr12q24.31	0006810 // transport // inferred from electronic annotation /// 0015031 // protein transport // inferred from electronic annotation /// 0016192 // vesicle-mediated transport // inferred from electronic annotation	0000139 // Golgi membrane // inferred from electronic annotation /// 0005792 // microsome // inferred from sequence or structural similarity /// 0005793 // ER-Golgi intermediate compartment // inferred from direct assay /// 0005794 // Golgi apparatus // i	0005515 // protein binding // inferred from physical interaction	---
204426_at	transmembrane emp24 domain trafficking protein 2	TMED2	138.425	135.6	42.2193	100	57.7	49.25	25.5936	100	1.025	2.03496	60.9375	3.125	0.00050469	2.38533e-17	2.78053e-16	1.69563e-11	35.9375	75	64.2857	chr12q24.31	0006810 // transport // inferred from electronic annotation /// 0015031 // protein transport // inferred from electronic annotation /// 0016192 // vesicle-mediated transport // inferred from electronic annotation	0000139 // Golgi membrane // inferred from electronic annotation /// 0005792 // microsome // inferred from sequence or structural similarity /// 0005793 // ER-Golgi intermediate compartment // inferred from direct assay /// 0005794 // Golgi apparatus // i	0005515 // protein binding // inferred from physical interaction	---
209754_s_at	thymopoietin	TMPO	117.7	113	38.1154	100	81.475	75.5	19.9442	100	0.715625	1.64219	65.625	1.5625	0.0392284	4.20839e-12	3.0799e-10	1.25244e-08	32.8125	50	71.4286	chr12q22	0045449 // regulation of transcription // inferred from electronic annotation	0000785 // chromatin // inferred from direct assay /// 0005634 // nucleus // inferred from direct assay /// 0005634 // nucleus // inferred from electronic annotation /// 0005634 // nucleus // traceable author statement /// 0005635 // nuclear envelope // i	0003677 // DNA binding // inferred from electronic annotation /// 0005515 // protein binding // inferred from physical interaction /// 0005515 // protein binding // inferred from electronic annotation /// 0005521 // lamin binding // traceable author state	---
226322_at	transmembrane and tetratricopeptide repeat containing 1	TMTC1	195.175	223.2	89.3687	100	65.6125	42.55	60.0804	62.5	2.4125	5.32396	78.125	7.8125	0.0392728	3.01436e-08	6.0846e-08	1.98295e-05	14.0625	25	25	chr12p11.22	---	0005739 // mitochondrion // inferred from electronic annotation /// 0016020 // membrane // inferred from electronic annotation /// 0016021 // integral to membrane // inferred from electronic annotation	0005488 // binding // inferred from electronic annotation	---
224397_s_at	transmembrane and tetratricopeptide repeat containing 1	TMTC1	82.1625	97.6	34.9183	87.5	32.9	24.4	29.4062	50	1.90469	3.74428	68.75	3.125	0.0415245	7.48644e-08	5.46638e-07	2.32145e-05	28.125	50	53.5714	chr12p11.22	---	0005739 // mitochondrion // inferred from electronic annotation /// 0016020 // membrane // inferred from electronic annotation /// 0016021 // integral to membrane // inferred from electronic annotation	0005488 // binding // inferred from electronic annotation	---
226931_at	transmembrane and tetratricopeptide repeat containing 1	TMTC1	91.4	89.25	40.7513	75	35.9375	32.9	13.4798	12.5	1.30469	2.4703	84.375	0	0.0353168	2.25181e-08	2.86695e-05	1.64265e-08	15.625	46.4286	60.7143	chr12p11.22	---	0005739 // mitochondrion // inferred from electronic annotation /// 0016020 // membrane // inferred from electronic annotation /// 0016021 // integral to membrane // inferred from electronic annotation	0005488 // binding // inferred from electronic annotation	---
216027_at	thioredoxin-related transmembrane protein 4	TMX4	299.35	357.55	135.922	100	643.188	583.15	247.826	100	-0.914063	-1.88434	0	71.875	0.00953878	1.27085e-12	2.07453e-08	6.64651e-11	28.125	39.2857	39.2857	chr20p12	0006810 // transport // inferred from electronic annotation /// 0022900 // electron transport chain // inferred from electronic annotation /// 0045454 // cell redox homeostasis // inferred from electronic annotation	0016020 // membrane // inferred from electronic annotation /// 0016021 // integral to membrane // inferred from electronic annotation	---	---
206025_s_at	tumor necrosis factor, alpha-induced protein 6	TNFAIP6	763.425	683.55	411.374	100	479.712	433.4	192.767	100	0.589062	1.50427	62.5	25	0.226665	0.00474419	0.02217	0.0126399	12.5	14.2857	28.5714	chr2q23.3	0006954 // inflammatory response // traceable author statement /// 0007155 // cell adhesion // inferred from electronic annotation /// 0007165 // signal transduction // traceable author statement /// 0007267 // cell-cell signaling // traceable author stat	---	0005488 // binding // inferred from electronic annotation /// 0005540 // hyaluronic acid binding // inferred from electronic annotation /// 0005540 // hyaluronic acid binding // traceable author statement	---
206026_s_at	tumor necrosis factor, alpha-induced protein 6	TNFAIP6	1245.72	1265.15	628.616	100	783.188	691.15	347.647	100	0.614062	1.53056	60.9375	20.3125	0.223926	0.00318162	0.015217	0.0103824	18.75	21.4286	25	chr2q23.3	0006954 // inflammatory response // traceable author statement /// 0007155 // cell adhesion // inferred from electronic annotation /// 0007165 // signal transduction // traceable author statement /// 0007267 // cell-cell signaling // traceable author stat	---	0005488 // binding // inferred from electronic annotation /// 0005540 // hyaluronic acid binding // inferred from electronic annotation /// 0005540 // hyaluronic acid binding // traceable author statement	---
213201_s_at	troponin T type 1 (skeletal, slow)	TNNT1	177.138	176.4	62.5999	87.5	102.575	75.85	72.9914	25	0.854688	1.80837	68.75	12.5	0.0277162	1.28932e-06	3.8036e-06	0.000211746	18.75	32.1429	39.2857	chr19q13.4	0003009 // skeletal muscle contraction // inferred from mutant phenotype /// 0006937 // regulation of muscle contraction // inferred from electronic annotation /// 0031444 // slow-twitch skeletal muscle fiber contraction // inferred from electronic annota	0005861 // troponin complex // inferred from direct assay /// 0005861 // troponin complex // inferred from mutant phenotype /// 0005861 // troponin complex // inferred from electronic annotation	0005523 // tropomyosin binding // inferred from mutant phenotype /// 0031014 // troponin T binding // inferred from electronic annotation	Striated_muscle_contraction // GenMAPP
204140_at	tyrosylprotein sulfotransferase 1	TPST1	245.788	225.9	151.431	87.5	73.85	74.45	24.2935	62.5	1.51875	2.86543	65.625	4.6875	0.0225463	1.28585e-10	4.01235e-06	9.53465e-12	29.6875	25	78.5714	chr7q11.21	0006478 // peptidyl-tyrosine sulfation // traceable author statement /// 0006954 // inflammatory response // traceable author statement	0000139 // Golgi membrane // inferred from electronic annotation /// 0005624 // membrane fraction // traceable author statement /// 0005794 // Golgi apparatus // inferred from electronic annotation /// 0016020 // membrane // inferred from electronic annot	0008146 // sulfotransferase activity // inferred from electronic annotation /// 0008476 // protein-tyrosine sulfotransferase activity // inferred from electronic annotation /// 0008476 // protein-tyrosine sulfotransferase activity // traceable author stat	---
240265_at	TRAF3 interacting protein 3	TRAF3IP3	142.588	129.25	45.2111	100	246.15	237.5	115.609	100	-0.607813	-1.52395	15.625	67.1875	0.102986	6.59122e-05	5.39318e-05	0.00306753	17.1875	46.4286	25	chr1q32	0006355 // regulation of transcription, DNA-dependent // inferred from electronic annotation	0005634 // nucleus // inferred from electronic annotation /// 0016020 // membrane // inferred from electronic annotation /// 0016021 // integral to membrane // inferred from electronic annotation	0003677 // DNA binding // inferred from electronic annotation /// 0005515 // protein binding // inferred from physical interaction	---
222768_s_at	tRNA methyltransferase 6 homolog (S. cerevisiae)	TRMT6	880.475	839.75	229.697	100	587.787	582.3	96.7849	100	0.345313	1.27043	64.0625	9.375	0.00879267	6.78402e-06	0.00141134	9.73605e-07	26.5625	50	92.8571	chr20p12.3	0006413 // translational initiation // inferred from electronic annotation /// 0006446 // regulation of translational initiation // inferred from electronic annotation /// 0008033 // tRNA processing // inferred from electronic annotation	0005634 // nucleus // inferred from electronic annotation	0003743 // translation initiation factor activity // inferred from electronic annotation /// 0005515 // protein binding // inferred from physical interaction /// 0008168 // methyltransferase activity // inferred from electronic annotation /// 0016740 // t	---
233970_s_at	tRNA methyltransferase 6 homolog (S. cerevisiae)	TRMT6	681.662	670.4	162.269	100	482.275	496.3	85.3045	100	0.48125	1.39595	64.0625	3.125	0.0164384	4.02097e-10	4.04692e-06	9.58987e-11	32.8125	60.7143	71.4286	chr20p12.3	0006413 // translational initiation // inferred from electronic annotation /// 0006446 // regulation of translational initiation // inferred from electronic annotation /// 0008033 // tRNA processing // inferred from electronic annotation	0005634 // nucleus // inferred from electronic annotation	0003743 // translation initiation factor activity // inferred from electronic annotation /// 0005515 // protein binding // inferred from physical interaction /// 0008168 // methyltransferase activity // inferred from electronic annotation /// 0016740 // t	---
207001_x_at	TSC22 domain family, member 3	TSC22D3	631.563	621	104.993	100	389.487	363.35	109.631	100	0.678125	1.60006	64.0625	0	0.00194261	1.14751e-18	1.92274e-18	3.824e-11	35.9375	71.4286	50	chrXq22.3	0006355 // regulation of transcription, DNA-dependent // inferred from electronic annotation /// 0006355 // regulation of transcription, DNA-dependent // traceable author statement /// 0006916 // anti-apoptosis // inferred from electronic annotation /// 0	---	0003700 // sequence-specific DNA binding transcription factor activity // inferred from electronic annotation /// 0003700 // sequence-specific DNA binding transcription factor activity // traceable author statement	---
209191_at	tubulin, beta 6	TUBB6	368.45	324.85	207.172	100	234.787	242.45	53.38	100	0.596875	1.51244	62.5	3.125	0.106719	7.50053e-07	0.000301872	2.29404e-07	34.375	50	57.1429	chr18p11.21	0007017 // microtubule-based process // inferred from electronic annotation /// 0007018 // microtubule-based movement // inferred from electronic annotation /// 0051258 // protein polymerization // inferred from electronic annotation	0005874 // microtubule // inferred from electronic annotation /// 0043234 // protein complex // inferred from electronic annotation	0000166 // nucleotide binding // inferred from electronic annotation /// 0003924 // GTPase activity // inferred from electronic annotation /// 0005198 // structural molecule activity // inferred from electronic annotation /// 0005525 // GTP binding // inf	---
232180_at	UDP-glucose pyrophosphorylase 2	UGP2	47.025	32	30.9836	100	79.7875	88.3	33.6878	100	-0.870312	-1.82806	9.375	60.9375	0.0638312	5.94598e-06	6.36233e-05	0.000188295	29.6875	50	46.4286	chr2p14-p13	0006011 // UDP-glucose metabolic process // traceable author statement /// 0006011 // UDP-glucose metabolic process // inferred from electronic annotation /// 0006065 // UDP-glucuronate biosynthetic process // not recorded /// 0008152 // metabolic process	0005625 // soluble fraction // inferred from electronic annotation /// 0005737 // cytoplasm // non-traceable author statement /// 0005737 // cytoplasm // inferred from electronic annotation	0003983 // UTP:glucose-1-phosphate uridylyltransferase activity // traceable author statement /// 0003983 // UTP:glucose-1-phosphate uridylyltransferase activity // inferred from electronic annotation /// 0005515 // protein binding // inferred from physic	Circadian_Exercise // GenMAPP /// Glycogen_Metabolism // GenMAPP
200883_at	ubiquinol-cytochrome c reductase core protein II	UQCRC2	1225.85	1166.5	168.086	100	929.175	865.15	198.487	100	0.364063	1.28705	62.5	12.5	0.00745579	7.25322e-11	2.92893e-10	6.83797e-07	25	46.4286	57.1429	chr16p12	0006119 // oxidative phosphorylation // traceable author statement /// 0006508 // proteolysis // inferred from electronic annotation /// 0006810 // transport // inferred from electronic annotation /// 0009060 // aerobic respiration // traceable author sta	0005634 // nucleus // inferred from direct assay /// 0005739 // mitochondrion // inferred from direct assay /// 0005739 // mitochondrion // inferred from electronic annotation /// 0005743 // mitochondrial inner membrane // inferred from electronic annotat	0003824 // catalytic activity // inferred from electronic annotation /// 0004222 // metalloendopeptidase activity // inferred from electronic annotation /// 0005515 // protein binding // inferred from physical interaction /// 0008270 // zinc ion binding /	Electron_Transport_Chain // GenMAPP
211749_s_at	vesicle-associated membrane protein 3 (cellubrevin)	VAMP3	804.337	803.2	130.432	100	577.15	541.95	114.657	100	0.45625	1.37197	67.1875	4.6875	0.00342449	4.65198e-12	4.91002e-10	2.27145e-08	28.125	60.7143	60.7143	chr1p36.23	0001921 // positive regulation of receptor recycling // inferred from sequence or structural similarity /// 0001921 // positive regulation of receptor recycling // inferred from electronic annotation /// 0006461 // protein complex assembly // inferred fro	0005792 // microsome // inferred from electronic annotation /// 0005886 // plasma membrane // inferred from sequence or structural similarity /// 0005886 // plasma membrane // inferred from electronic annotation /// 0016020 // membrane // inferred from el	0005515 // protein binding // inferred from physical interaction /// 0005515 // protein binding // inferred from electronic annotation	---
205844_at	vanin 1	VNN1	1653.72	1602.85	543.654	100	2338.49	2552.25	852.862	100	-0.50625	-1.42035	14.0625	60.9375	0.231632	0.000730018	0.00309057	0.00554777	25	32.1429	28.5714	chr6q23-q24	0002526 // acute inflammatory response // inferred from sequence or structural similarity /// 0002526 // acute inflammatory response // inferred from electronic annotation /// 0002544 // chronic inflammatory response // inferred from sequence or structura	0005886 // plasma membrane // inferred from electronic annotation /// 0016020 // membrane // inferred from electronic annotation /// 0016021 // integral to membrane // traceable author statement /// 0031225 // anchored to membrane // inferred from electro	0016787 // hydrolase activity // inferred from electronic annotation /// 0016810 // hydrolase activity, acting on carbon-nitrogen (but not peptide) bonds // inferred from electronic annotation /// 0016811 // hydrolase activity, acting on carbon-nitrogen (	---
220528_at	vanin 3	VNN3	500.925	511.8	188.424	100	801.837	866.05	226.504	100	-0.704687	-1.62979	9.375	62.5	0.0440719	3.71647e-07	0.000131056	3.88751e-07	28.125	32.1429	50	chr6q23.2	0006807 // nitrogen compound metabolic process // inferred from electronic annotation	0005886 // plasma membrane // inferred from electronic annotation /// 0016020 // membrane // inferred from electronic annotation /// 0031225 // anchored to membrane // inferred from electronic annotation	0016787 // hydrolase activity // inferred from electronic annotation /// 0016810 // hydrolase activity, acting on carbon-nitrogen (but not peptide) bonds // inferred from electronic annotation /// 0016811 // hydrolase activity, acting on carbon-nitrogen (	---
210935_s_at	WD repeat domain 1	WDR1	111.55	109.95	21.0454	100	72.4	72.15	20.3267	100	0.584375	1.49939	60.9375	0	0.00448238	4.56898e-14	4.06104e-12	1.85061e-09	39.0625	78.5714	78.5714	chr4p16.1	0007605 // sensory perception of sound // traceable author statement	0005576 // extracellular region // not recorded /// 0005737 // cytoplasm // inferred from electronic annotation /// 0005829 // cytosol // not recorded /// 0005856 // cytoskeleton // inferred from electronic annotation	0003779 // actin binding // inferred from electronic annotation /// 0005515 // protein binding // inferred from physical interaction	Hypertrophy_model // GenMAPP
229694_at	WD repeat domain 11	WDR11	144.413	173.95	54.4088	87.5	289.4	334.65	135.006	75	-0.84375	-1.79471	18.75	75	0.0946004	0.000181099	0.000394632	0.00412239	6.25	39.2857	39.2857	chr10q26	---	0016020 // membrane // inferred from electronic annotation /// 0016021 // integral to membrane // inferred from electronic annotation	---	---
228949_at	wntless homolog (Drosophila)	WLS	406.363	403.1	111.376	100	570.587	523.7	122.191	100	-0.5	-1.41421	4.6875	64.0625	0.0174549	3.25963e-09	2.21297e-06	5.31907e-08	31.25	42.8571	39.2857	chr1p31.3	0007275 // multicellular organismal development // inferred from electronic annotation /// 0016055 // Wnt receptor signaling pathway // inferred from electronic annotation /// 0043123 // positive regulation of I-kappaB kinase/NF-kappaB cascade // inferred	0000139 // Golgi membrane // inferred from electronic annotation /// 0005794 // Golgi apparatus // inferred from electronic annotation /// 0016020 // membrane // inferred from electronic annotation /// 0016021 // integral to membrane // inferred from elec	0004871 // signal transducer activity // inferred from sequence or structural similarity /// 0004872 // receptor activity // inferred from electronic annotation	---
221958_s_at	wntless homolog (Drosophila)	WLS	430.013	454.75	135.878	100	627.4	628.1	120.831	100	-0.525	-1.43893	6.25	60.9375	0.0169245	1.03821e-08	8.45588e-06	7.00944e-08	32.8125	42.8571	50	chr1p31.3	0006350 // transcription // inferred from electronic annotation /// 0007275 // multicellular organismal development // inferred from electronic annotation /// 0016055 // Wnt receptor signaling pathway // inferred from electronic annotation /// 0043123 //	0000139 // Golgi membrane // inferred from electronic annotation /// 0005634 // nucleus // inferred from direct assay /// 0005634 // nucleus // inferred from electronic annotation /// 0005730 // nucleolus // inferred from direct assay /// 0005737 // cytop	0003677 // DNA binding // inferred from electronic annotation /// 0004871 // signal transducer activity // inferred from sequence or structural similarity /// 0004871 // signal transducer activity // inferred from mutant phenotype /// 0004872 // receptor	---
242234_at	XIAP associated factor 1	XAF1	62.4625	60.55	22.4695	100	100.363	112.25	49.5328	100	-0.534375	-1.44831	7.8125	62.5	0.325379	0.00207514	0.00112703	0.0262005	29.6875	71.4286	42.8571	chr17p13.1	0006915 // apoptosis // inferred from electronic annotation	0005634 // nucleus // inferred from electronic annotation /// 0005737 // cytoplasm // inferred from electronic annotation /// 0005739 // mitochondrion // inferred from electronic annotation	0008270 // zinc ion binding // inferred from electronic annotation /// 0046872 // metal ion binding // inferred from electronic annotation	---
227671_at	X (inactive)-specific transcript (non-protein coding)	XIST	2102.19	2192.3	707.305	100	1261.5	577.55	1390.46	50	4.27656	19.3809	60.9375	21.875	0.0521194	1.3475e-07	1.47237e-09	0.00027295	17.1875	32.1429	21.4286	chrXq13.2	---	---	---	---
224589_at	X (inactive)-specific transcript (non-protein coding)	XIST	137.287	132.7	56.0122	100	64.0375	30.8	69.3981	50	2.2625	4.79822	60.9375	10.9375	0.0317168	4.96447e-08	1.22645e-09	0.000137758	28.125	53.5714	35.7143	chrXq13.2	---	---	---	---
235927_at	exportin 1 (CRM1 homolog, yeast)	XPO1	96.175	107.5	26.1407	100	147.162	173.2	61.9378	100	-0.5875	-1.50264	14.0625	64.0625	0.247964	0.00123867	0.00174907	0.0141813	21.875	42.8571	53.5714	chr2p16	0006611 // protein export from nucleus // inferred from electronic annotation /// 0006810 // transport // inferred from electronic annotation /// 0006886 // intracellular protein transport // inferred from electronic annotation /// 0009615 // response to	0000776 // kinetochore // inferred from direct assay /// 0005634 // nucleus // inferred from electronic annotation /// 0005635 // nuclear envelope // traceable author statement /// 0005642 // annulate lamellae // inferred from direct assay /// 0005654 //	0003723 // RNA binding // inferred from electronic annotation /// 0005488 // binding // inferred from electronic annotation /// 0005515 // protein binding // inferred from physical interaction /// 0005515 // protein binding // inferred from electronic ann	---
233878_s_at	5'-3' exoribonuclease 2	XRN2	196.063	199.85	45.5627	100	122.175	118.35	21.1311	100	0.634375	1.55227	65.625	0	0.0011375	6.83305e-19	3.23604e-16	1.37456e-12	34.375	75	60.7143	chr20p11.2-p11.1	0000738 // DNA catabolic process, exonucleolytic // inferred from direct assay /// 0006139 // nucleobase, nucleoside, nucleotide and nucleic acid metabolic process // inferred from electronic annotation /// 0006350 // transcription // inferred from electr	0005622 // intracellular // inferred from electronic annotation /// 0005634 // nucleus // inferred from electronic annotation /// 0005634 // nucleus // traceable author statement /// 0005730 // nucleolus // inferred from direct assay /// 0005730 // nucleo	0003676 // nucleic acid binding // inferred from electronic annotation /// 0004518 // nuclease activity // traceable author statement /// 0004518 // nuclease activity // inferred from electronic annotation /// 0004527 // exonuclease activity // inferred f	mRNA_processing_Reactome // GenMAPP
200641_s_at	tyrosine 3-monooxygenase/tryptophan 5-monooxygenase activation protein, zeta polypeptide	YWHAZ	1220.74	1162.7	150.099	100	869.288	835.7	125.432	100	0.509375	1.42343	78.125	0	0.000309497	2.86848e-26	8.84057e-22	1.92749e-17	21.875	82.1429	60.7143	chr8q23.1	0002553 // histamine secretion by mast cell // inferred from electronic annotation /// 0006605 // protein targeting // inferred from electronic annotation /// 0006626 // protein targeting to mitochondrion // inferred from electronic annotation /// 0006916	0005625 // soluble fraction // inferred from electronic annotation /// 0005634 // nucleus // inferred from electronic annotation /// 0005737 // cytoplasm // inferred from electronic annotation /// 0005737 // cytoplasm // traceable author statement /// 000	0004497 // monooxygenase activity // inferred from electronic annotation /// 0005515 // protein binding // inferred from physical interaction /// 0005515 // protein binding // inferred from electronic annotation /// 0008134 // transcription factor binding	---
205883_at	zinc finger and BTB domain containing 16	ZBTB16	740.3	570.3	641.25	100	188.475	146.1	108.406	100	1.34063	2.53261	64.0625	21.875	0.129882	1.04124e-05	0.00163658	1.29728e-06	14.0625	10.7143	42.8571	chr11q23.1	0001501 // skeletal system development // inferred from electronic annotation /// 0001823 // mesonephros development // inferred from sequence or structural similarity /// 0001823 // mesonephros development // inferred from electronic annotation /// 00063	0005622 // intracellular // inferred from electronic annotation /// 0005634 // nucleus // inferred from direct assay /// 0005634 // nucleus // inferred from electronic annotation /// 0005829 // cytosol // inferred from electronic annotation /// 0005886 //	0003676 // nucleic acid binding // inferred from electronic annotation /// 0003677 // DNA binding // inferred from direct assay /// 0003677 // DNA binding // non-traceable author statement /// 0003677 // DNA binding // inferred from electronic annotation	---
212423_at	zinc finger, CCHC domain containing 24	ZCCHC24	312.962	266.45	111.572	100	548.813	500.45	238.776	100	-0.832812	-1.78115	7.8125	70.3125	0.0130506	1.14622e-10	4.90764e-08	3.53237e-08	21.875	32.1429	35.7143	chr10q22.3	---	---	0003676 // nucleic acid binding // inferred from electronic annotation /// 0008270 // zinc ion binding // inferred from electronic annotation /// 0046872 // metal ion binding // inferred from electronic annotation	---
212419_at	zinc finger, CCHC domain containing 24	ZCCHC24	188.212	141.85	80.4092	100	316.738	296.55	123.338	100	-0.796875	-1.73733	6.25	62.5	0.0158142	1.92409e-09	4.92338e-07	1.4213e-07	31.25	46.4286	39.2857	chr10q22.3	---	---	0003676 // nucleic acid binding // inferred from electronic annotation /// 0008270 // zinc ion binding // inferred from electronic annotation /// 0046872 // metal ion binding // inferred from electronic annotation	---
201367_s_at	zinc finger protein 36, C3H type-like 2	ZFP36L2	125.063	126.95	47.2685	100	69.1875	63.25	23.6428	100	0.698438	1.62275	62.5	1.5625	0.0135642	5.29252e-12	4.12103e-09	4.08515e-09	35.9375	50	78.5714	chr2p22.3-p21	0008283 // cell proliferation // traceable author statement	0005634 // nucleus // inferred from electronic annotation	0003676 // nucleic acid binding // inferred from electronic annotation /// 0003677 // DNA binding // inferred from electronic annotation /// 0003700 // sequence-specific DNA binding transcription factor activity // traceable author statement /// 0003723 /	---
EG: Experiment group of chips (8 RA bone marrow monocytes), BG: Baseline group of chips (8 OA bone marrow monocytes), FC: Fold Change, SLR: Signal Log Ratio (i.e. Log2 of FC)
